# Supplementary material for: Impact of snow deposition on major and trace element concentrations and fluxes in surface waters of Western Siberian Lowland
Source: Copernicus journal article supplement (doi:10.5194/hess-2016-578), 2016-11-22
Supplement: Supplementary file [file hess-2016-578-AC5-supplement.pdf]

# Impact of snow deposition on major and trace element concentrations and elementary fluxes in surface waters of Western Siberian Lowland across a 1700-km latitudinal gradient

Vladimir P. Shevchenko<sup>1</sup>, Oleg S. Pokrovsky<sup>2</sup>, Sergey N. Vorobyev<sup>3</sup>, Ivan V. Krickov<sup>3</sup>, Rinat M. Manasyrov<sup>3,4</sup>, Nadezhda V. Politova<sup>1</sup>, Sergey G. Kopysov<sup>3</sup>, Olga M. Dara<sup>1</sup>, Yves Auda<sup>2</sup>, Liudmila S. Shirokova<sup>2,4</sup>, Larisa G. Kolesnichenko<sup>3</sup>, Valery A. Zemtsov<sup>3</sup>, Sergey N. Kirpotin<sup>3</sup>

<sup>1</sup>Shirshov Institute of Oceanology RAS, 36 Nakhimovsky Pr., Moscow, Russia

<sup>2</sup>Geosciences Environment Toulouse, UMR 5563 CNRS, University of Toulouse, 14 Avenue Edouard Belin 31400, Toulouse, France

<sup>3</sup>BIO-GEO-CLIM Laboratory, Tomsk State University, 36 Lenina, Tomsk, Russia

<sup>4</sup>N. Laverov Federal Center for Integrated Arctic Research, Russian Academy of Science, Arkhangelsk, Russia

Correspondence to: Oleg S. Pokrovsky (oleg.pokrovsky@get.omp.eu)

**Abstract.** Towards a better understanding of chemical composition of snow and its impact on surface water hydrochemistry in poorly studied Western Siberia Lowland (WSL), the surface layer of snow was sampled in February 2014 across a 1700-km latitudinal gradient (c.a. 56.5 to 68°N). We aimed at assessing the latitudinal effect on both dissolved and particulate forms of element in snow and quantifying the impact atmospheric input to element storage and export fluxes in inland waters of the WSL. The concentration of dissolved+colloidal (< 0.45 µm) Fe, Co, Cu, As, La increased by a factor of 2 to 5 north of 63°N compared to southern regions. The pH and dissolved Ca, Mg, Sr, Mo and U in snow water increased with the increase in concentration of particulate fraction (PF). Principal Component Analyses of major and trace element concentration in both dissolved and particulate fractions revealed 2 factors not linked to the latitude. A hierarchical cluster analysis yielded several group of elements originated from alumino-silicate mineral matrix, carbonate minerals and marine aerosols or belonging to volatile atmospheric heavy metals, labile elements from weatherable minerals and nutrients. The main sources of mineral components in PF are desert and semi-desert regions of central Asia.

The snow water concentration of DIC, Cl, SO<sub>4</sub>, Mg, Ca, Cr, Co, Ni, Cu, Mo, Cd, Sb, Cs, W, Pb and U exceeded or were comparable with spring-time concentration in thermokarst lakes of the permafrost-affected WSL zone. The spring-time river fluxes of DIC, Cl, SO<sub>4</sub>, Na, Mg, Ca, Rb, Cs, metals (Cr, Co, Ni, Cu, Zn, Cd, Pb), metalloids (As, Sb), Mo and U in the discontinuous to continuous permafrost zone (64-68°N) can be explained solely by melting of accumulated snow. The impact of snow deposition on riverine fluxes of elements strongly increased northward, in discontinuous and continuous permafrost zones of frozen peat bogs. This was consistent with the decrease of the impact of rock lithology on river chemical composition in the permafrost zone of WSL, relative to the permafrost-free regions. Therefore, the present study demonstrates significant and previously underestimated atmospheric input of many major and trace elements to their riverine fluxes during spring flood. A broader impact of this result is that current estimations of river water fluxes response to the climate warming in high latitudes may be unwarranted without detailed analysis of winter precipitation.

## 38 1 Introduction

39 The snow cover exhibits a number of properties making it unique natural archive and indicator of the ecosystem  
40 status (Baltrėnaitė et al., 2014; Bokhorst et al., 2016; Callaghan et al., 2011; Caritat et al., 1998, 2005; Garbarino et al.,  
41 2002; Guéguen et al., 2016; Kashulina et al., 2014; Lisitzin, 2002; Niu et al., 2016; Ross and Granat, 1986; Singh et al.,  
42 2011; Siudek et al., 2015; Van de Velde et al., 1999; Walker et al., 2003). The snow washes out insoluble aerosols particles  
43 from the atmosphere as well as soluble compounds, including various pollutants (Telmer et al., 2004; Barrie, 1986; Tranter  
44 et al., 1986, 1987). Unlike rain, the snow remains at the soil surface and thus records all atmospheric input during the  
45 glacial period of the year. In boreal and subarctic regions, both dissolved and particulate fraction of snow water reflect the  
46 air chemistry in winter, when the land is covered by snow and the water surfaces are covered by ice. During winter, the  
47 input of mineral compounds from adjacent regions is minimal and the main factor controlling chemical composition of  
48 snow is long-range, hundred and thousand km, atmospheric transport (Franzén et al., 1994; Huang et al., 2015;  
49 Shevchenko, 2003, Shevchenko et al., 2000, 2010, 2016; Welch et al., 1991; Zdanowicz et al., 1998, 2006; Krachler et al.,  
50 2005; Zhang et al., 2015).

51 Several studies of major elements and some trace metals in particulate fraction of snow have been conducted in  
52 western Siberia (Boyarkina et al., 1993; Ermolov et al., 2014; Kashulina et al., 2014; Moskovchenko and Babushkin, 2012;  
53 Shevchenko et al., 2015; Talovskaya et al., 2014). The dissolved ( $< 0.45 \mu\text{m}$  or  $< 0.22 \mu\text{m}$ ) fraction of snow was  
54 traditionally studied in European subarctic (Caritat et al., 1998; Chekushin et al., 1998; Kashulina et al., 2014; Reimann et  
55 al., 1999; Reinosdotter and Viklander, 2005) but the data on trace elements in snow water collected in boreal, arctic and  
56 subarctic regions are limited. This is especially true for large and geographically homogeneous territories of western  
57 Siberia, presenting relatively similar level of snow deposition during winter seasons (i.e., from 100 mm of water in the  
58 south to 140–150 mm of water in the north) without any pronounced influence of large industrial centers, mountain regions  
59 and marine aerosols over the territory close to 1.5 million  $\text{km}^2$  (Resources, 1972, 1973; Boyarkina et al., 2013).

60 The originality of the present study consists in *i*) sampling of substantial ( $\sim 1700 \text{ km}$ ) latitudinal transect in  
61 relatively pristine zones comprising forest, forest tundra and tundra within the permafrost-free, discontinuous and  
62 continuous permafrost regions; *ii*) assessment of both dissolved+colloidal and particulate forms of major and trace  
63 elements in snow samples. Given the scarcity of available measurements of snow chemical and particulate composition in  
64 Western Siberia, we aimed at addressing the following specific issues: (1) characterizing the effect of the latitude on major  
65 and trace element concentration in dissolved ( $< 0.45 \mu\text{m}$ ) and particulate ( $> 0.45 \mu\text{m}$ ) fractions of snow; (2) testing the link  
66 between dissolved and particulate fractions of elements and the impact of particle mineralogy on snow chemical  
67 composition; (3) comparing dissolved concentrations of major and trace elements in snow to those in lakes and rivers  
68 across the latitudinal gradient of WSL and (4) assessing the share of snow deposition on seasonal and annual export of  
69 dissolved elements by western Siberian rivers. Via addressing quantitatively the abovementioned issues using unified  
70 methodology in quite large geographical coverage (56 to  $68^\circ\text{N}$ ) of orographically flat low populated terrain, we anticipate  
71 to enhance our knowledge of the winter atmospheric deposition in western Siberia, in the absence of direct influence of  
72 marine aerosols and large industrial centers. This should eventually allow to evaluate the impact of snow deposition on  
73 chemical composition and elementary fluxes of subarctic inland waters across a large latitudinal gradient of climate and  
74 permafrost parameters.

75

## 76 2. Study site, materials and methods

### 77 2.1. Geographic settings

78 Western Siberia Lowland, located between the Ural mountains and the Yenisei River, extends over 2000 km  
79 from south to north and presents highly homogeneous, from physico-geographical point of view, taiga, forest-tundra  
80 and tundra landscapes comprising bogs and mires in the permafrost-free zone and thermokarst lakes developed on flat  
81 peat bogs (palsa) in the permafrost-bearing zone. Detailed physico-geographical description, hydrology, lithology and  
82 soils can be found in earlier works (Botch et al., 1995; Smith et al., 2004; Frey and Smith, 2007; Beilman et al., 2009)  
83 and in our recent geochemical studies (Manasyopov et al., 2014; Stepanova et al., 2015; Pokrovsky et al., 2015). Because  
84 of its flat orographic context, extensive vegetation cover and relative remoteness from the Arctic Coast (except the north  
85 of the Gyda and the Yamal peninsulas), the atmospheric precipitates in winter are likely to bear the signature of remote  
86 desert and semi-desert regions of Central Asia. The anthropogenic impact is not expected to be strongly pronounced  
87 because of *i*) low population density (average 6 people/km<sup>2</sup> but only 0.5–2 people/km<sup>2</sup> in the northern half of WSL) and  
88 *ii*) moderate local pollution from the gas burning in oil wells mostly in the permafrost-free zone, south of the Surgut  
89 town. The part of WSL north of 64°N contains essentially gas exploration facilities (no gas burning) and minimally  
90 impacts the environment. Taken together, the latitudinal profile of the WSL presents a unique opportunity to study the  
91 chemistry of atmospheric deposits within highly homogeneous physico-geographical context and relatively low local  
92 anthropogenic impact.

### 94 2.2. Snow sampling

95 The snow of the WSL was sampled along the latitudinal transect S → N, from the vicinity of the Tomsk city (zone  
96 of southern taiga) to the eastern coast of the Ob estuary (tundra zone) from 19.02.2014 to 5.03.2014 (Fig. 1). The possible  
97 sources of snow deposition and the pathways of aerosols transport to the WSL were reconstructed by analyzing  
98 meteorological maps and by calculating back trajectories of air transport to the observation points using NOAA's  
99 HYSPLIT model (Draxler and Rolf, 2003). In order to assess a snapshot of snow deposition across 1700-km latitudinal  
100 profile and collect the freshest snow that was subjected to minimal transformation, we chose to sample only the upper layer  
101 of the snow cover. This technique, in contrast to traditional sampling of full snow column (i.e., Guéguen et al., 2016; Niu et  
102 al., 2017) allows adequate representation of the upper fresh snow layer that had minimal transformation at the soil, and  
103 frequently used in remote regions (Kang et al., 2007; Zhang et al., 2013). The isotope composition of collected snow  
104 proved its fresh character, not subjected to any metamorphism (Vasil'chuk et al., 2016).

105 The upper 0–5 cm of snow was sampled in 39 locations (Fig. 1). All sampling points were located more than 500  
106 m from the winter road. The sampling was performed using metal-free technique, in protected environment, using pre-  
107 cleaned plastic shovel and vinyl single-used gloves. Approximately 30 L of snow was collected into single-used  
108 polyethylene bags. These polyethylene bags were thoroughly washed with 1 M HCl and abundant MilliQ water in the  
109 clean room class A 10,000. In the laboratory, the snow was melted at ambient temperature, and filtered through pre-  
110 weighted acetate cellulose filters (Millipore, 47 mm diameter) of 0.45 µm poresize. The storage of unfiltered snow  
111 water samples was less than 1 h at 4°C.

### 113 2.3. Particle analyses

114 The sizes and morphology of particles on filters and elemental composition of individual particles were studied  
115 using scanning electron microscope VEGA 3 SEM (Tescan) with a microprobe attachment INCA Energy (Oxford  
116 Instruments). The mineralogical composition of particulate fraction on selected filters was studied by X-ray powder

117 diffractometric method on the D8 ADVANCE (Bruker AXS) X-ray diffractometer equipped with the LYNXEYE linear  
118 detector (Lisitzin et al., 2015). The uncertainty of the relative proportion of mineral composition was 1–2% and the  
119 detection limit was 1%.

120 Freshly melted snow water was filtered through pre-weighted 0.45 µm acetate cellulose (Millipore) filters. These  
121 filters were placed in the Petri dishes, dried at 60°C in an oven and digested using microwave acid attack which comprised  
122 6.5 mL concentrated HNO<sub>3</sub>, 3.5 mL concentrated HCl and 0.5 mL concentrated HF. HNO<sub>3</sub> and HCl were bi-distilled in the  
123 clean room and HF was commercial ultra-pure quality (Fluka). The filters were reacted 30 min in ultrasonic bath prior full  
124 digestion using Mars 5 microwave digestion system (CEM, France). For this, 10 samples of filters, 1 certified 2711a  
125 Montana II Soil standard and 1 blank filter sample were loaded into Teflon reactors subjected to treating at 150°C during  
126 20 min. After completing the digestion, the content of reactors was transferred to 30 mL Savilex vials and evaporated at  
127 70°C. The residue was dissolved in 10 mL of 10% HNO<sub>3</sub> and diluted by 2% HNO<sub>3</sub> prior to the analyses. For the analysis of  
128 snow particles on filters, the blanks (digestion of initial filters) were a factor of 10 to 100 lower than the filters with  
129 particles after 0.5-1.0 L of snow water filtration. The concentration of major and trace elements (TE) in filter digestion  
130 products was measured using an ICP-MS Agilent 7500 ce with ~3 µg/L of indium and rhenium as internal standards. 4 in-  
131 house external standards were analyzed every 10 samples. Necessary corrections for oxide and hydroxide ion interferences  
132 were made for rare earth elements (REE) and metals (Ariés et al., 2000). Based on replicate analyses of in-house standards  
133 and certified materials, the uncertainty for TE measurement ranged from 5 % at 0.1–100 µg/L to 10 % at 0.001–0.01 µg/L.  
134 Analyses of low concentrations of Hf, Ge, Cs, Ga, and W (e.g., on the order of 0.001 µg/L, comparable with detection  
135 limits) was possible with a minimal estimated uncertainty of 20%.

136

#### 137 2.4. Melted snow analyses

138 The pH and specific conductivity were measured on unfiltered snow water samples using Hanna portable  
139 instruments. The dissolved (< 0.45 µm) fraction of snow water was obtained via filtration using a polycarbonate  
140 Nalgene vacuum filter unit, and a PVC-made Mityvac hand vacuum pump. This fraction included colloidal and truly  
141 dissolved (ionic) forms. Blanks of MilliQ water were also placed in polyethylene bags for the same time as melting  
142 snow (≤ 1 h at 4°C) and processed via filtration similar to snow samples. The filtrates were divided into two parts; one  
143 was acidified with double distilled HNO<sub>3</sub> acid and stored in pre-cleaned HDPE vials for ICP MS analysis, the second  
144 part was stored in HDPE bottles without acidification, for dissolved organic and inorganic carbon analysis (DOC and  
145 DIC), respectively, and anion analysis.

146 The major anion concentrations (Cl<sup>-</sup>, SO<sub>4</sub><sup>2-</sup>) in the < 0.45 µm fraction were measured using ion chromatography  
147 (HPLC, Dionex ICS 2000i), with an uncertainty of 2%, estimated from the replicate analyses of PERADE and RAIN  
148 international certified materials. The DOC and DIC in this fraction were analyzed using a Carbon Total Analyzer  
149 (Shimadzu TOC-VSCN) with an uncertainty of 5% and a detection limit of 0.1 and 0.05 mg/L, respectively.

150 Filtered snow water samples were analyzed with an Element XR ICP MS allowing for much better precision of  
151 the analyses of highly diluted samples and avoiding many interferences compared to Agilent 7500 ce. The uncertainty of  
152 the Element XR analysis was ± 5%, while its detection limit was a factor of 100 lower than the traditional (Agilent)  
153 instrument. The Element XR operated in three modes depending on the elements measured: low resolution for B, Rb, Sr,  
154 Zr, Mo, Cd, Sb, Cs, Ba, REEs, Hf, W, Pb, Th, U; medium resolution for Na, Mg, Al, Si, P, Ca, Ti, V, Cr, Mn, Fe, Co, Ni,  
155 Cu, Zn, Ga, Sr, and high resolution for K and As. The agreement between two instruments for most elements was within 10  
156 %. The international geostandards SLRS-5 (Riverine Water References Material for Trace Metals certified by the National  
157 Research Council of Canada) was used to assess the validity and reproducibility of the analyses.

158

## 2.5. River fluxes and snow storage

The mass balance calculation of the degree of snow melt influence on element fluxes in WSL rivers was performed, taking into account of *i*) the water stock in snow (in mm snow water accumulated during winter), fairly well known for Western Siberia (Karnatzevitch and Khrushev, 2014; Resources, 1972, 1973; Zakharova et al., 2011) and *ii*) the spring-time river runoff (in mm during May and June) calculated from hydrological parameters. For water stock calculation, we used the available mean multi-annual daily and monthly discharges of WSL rivers across the latitudinal profile (Resources, 1972 and 1972 and recently compiled in the database R-ArcicNET ([www.r-arcticnet.sr.unh.edu](http://www.r-arcticnet.sr.unh.edu)). The WSL territory is covered by Russian Hydrological Survey (RHS) gauging stations which allowed to calculate the discharge during May-June as described elsewhere (Pokrovsky et al., 2015). The most recent complete hydrological data of small and medium size rivers in permafrost – affected area of WSL (Novikov et al., 2009) were used together with RHS database to calculate the spring flood fluxes of individual rivers and snow water stock for three latitudinal zones, 56-60°N, 60-64° and 64-68°N. Note that a comparison between the elementary snow stock and the river elementary discharge could not be performed for individual river watersheds, since no snow water chemical data are available with necessary spatial resolution. Therefore, we compared the winter snow stock with riverine spring flood fluxes of major and trace element for three latitudinal zones. For this, both spring flood flux of individual rivers and snow water stock were averaged for each latitudinal zone.

## 2.6. Statistical methods

Statistical analysis of the average, median and geometric mean values and the link between element concentration in suspended and dissolved fraction as well as comparison of different sampling sets (snow water and snow particles) included ANOVA, H-criterion of the Kruskal–Wallis and Mann–Whitney U tests. These tests allowed evaluating the difference between two sets of data separately for each TE following the approaches developed for lakes and rivers of western Siberia (Manasypov et al., 2014, 2015; Pokrovsky et al., 2015, 2016). The multiple regressions were performed for quantifying the relationship between dissolved and particulate concentration of TE and the latitudinal trends of concentrations and enrichment factors. More thorough statistical treatment of both log-transformed and non-transformed major and TE concentration in dissolved and particulate fraction of snow samples in each location included a normed PCA analysis using the ADE-4 R package (Thioulouse et al., 1997; Chessel et al., 2004) using the methods for scores and variables (De la Cruz and Holmes, 2011).

To identify the group of elements that behaved in a similar way in snow water and snow particles, we applied a complementary hierarchical cluster analysis (HCA) (e.g. Hartigan, 1975; Kaufman and Rousseeuw, 2005) which is widely adopted in geochemical interpretations of element concentration data (e.g. Bini et al., 2011; Levitan et al., 2015; Schot and van der Wal, 1992; Moragues-Quiroga (2017). We used the Ward's method (Ward, 1963) for the linkages rule, following previous studies (Gourdol et al., 2013; Lin et al., 2014). The Pearson correlation distance was used for the linkage distance, which is frequently used for cluster variables (Reimann et al., 2008). These choices are in agreement with the group search of the PCA loadings.

In order to assess the degree of element fractionation in snow particles, Al-normalized TE enrichment factor (EF) with respect to the average upper part of continental earth crust (Rudnick and Gao, 2003) was calculated according to:

$$EF = \frac{[TE]/[Al]_{sample}}{[TE]/[Al]_{crust}}$$

199 For the assessment of element enrichment factor in snow particles, a normalization to both general upper Earth  
200 crust and the local geological background (soil, peat and moss) was used. The reason for this is that, unlike in studies of the  
201 local pollution tracing in the European arctic (e.g., within the Kola Ecogeochemistry project, see de Caritat et al., 1997;  
202 Reimann and de Caritat, 2000; Reimann et al., 2000) or small-scale stream bed sediments or soils (N'guessan et al., 2009;  
203 Moragues-Quiroga et al., 2017; Levitan et al., 2015) where the normalization to the local soil or bedrock was necessary, the  
204 present study essentially deals with winter-period long-range atmospheric transport of soluble and mineral forms of  
205 elements. As such, following the common practice in this field, the normalization to upper Earth crust allowed assessing  
206 the true enrichment/depletion of the atmospheric aerosols. However, in order to better represent the elementary features of  
207 snow particles, the concentration of elements in PF was also compared with western Siberian mineral soils, peat and moss.

208  
209

### 210 3. Results

#### 211 3.1. Soluble fraction of the snow water

212 For all major and most trace elements, the concentrations in the blanks were below or comparable with analytical  
213 detection limits ( $\leq 0.1$  ng/L for Cd, Ba, Y, Zr, REEs, Hf, Pb, Th, U; 1 ng/L for Ga, Ge, Rb, Sr, Sb;  $\sim 10$  ng/L for Ti, V, Cr,  
214 Mn, Fe, Co, Ni, Cu, Zn, As). These values were at least 5 times lower than the average concentration of trace elements in  
215 snow samples. Most TE presented in this work exhibited  $\leq 15\%$ -agreement between the certified or recommended values  
216 and our measurements. The TE for which certified or recommended data were not available were considered only for the  
217 cases where we obtained good analytical reproducibility (i.e., the relative standard deviation based on our standard  
218 measurements was  $\leq 10\%$ ).

219 The latitude-averaged concentrations of dissolved and particulate fraction of snow samples are listed in **Table 1**.  
220 A full data set of major and TE concentration in snow water is given in the “Data availability” section. Examples of the  
221 effect of latitude on dissolved ( $< 0.45 \mu\text{m}$ ) element concentrations are shown in **Fig. 2**. Fe and Cu demonstrated a 2 to  
222 5-fold increase in dissolved concentration north of  $63^\circ\text{N}$  (at  $p < 0.05$ ). Zn and Pb did not exhibit any systematic effect of  
223 latitude, and Sb, Cd and Ni demonstrated a single maximum at c.a.  $63\text{--}65^\circ\text{N}$ . As exhibited two maxima, at  $63.5$  and  
224  $67.5^\circ\text{N}$  with overall 2 to 3-fold decreasing trend northward. All other major and trace elements demonstrated a lack of  
225 systematic variation of concentrations as a function of latitude (not shown).

226 The PCA treatment of soluble fraction suggested that at least two factors are interpretable. The PC1 x PC2  
227 correlation circle revealed two large groups of variables (**Fig. 3A**). The first group is composed of Al, Fe, Cr, Zr, Pb,  
228 REEs corresponding to lithogenic, poorly soluble trace elements. The second large group is composed of DOC, K, Rb,  
229 Cs, Mn, Co, Ba, Sb, Co, Mo, Mg, Si, Sr, Na, Ca, pH. These highly mobile elements presumably reflect the marine  
230 aerosols and leaching from soluble soil minerals such as carbonates as well as plant biomass. Similar factors determine  
231 chemical composition of snow water regardless of the latitude of the sampling and no specific conditions or limiting  
232 factors depended on geographical location.

233 The HCA analysis was conducted on the basis of first two factors of the PCA. The criterion of non-intersection  
234 between the groups allowed partitioning the chemical elements of the dissolved part into 6 specific groups presented in  
235 **Fig. 3B**. These groups characterize the elements according to their general chemical properties, ability to mobilize in  
236 aqueous solution from the solid minerals, affinity to the biota or their presence in the contaminated particles of  
237 industrial activity. Thus, the first two group of the dissolved fraction shown in **Fig. 3B** and encircled in **Fig. 3A**  
238 comprise low mobile elements likely originated from alumino-silicate mineral matrix (Al, Cr, REE, Ti, Zr, Fe, V) as  
239 well as some volatile heavy metals typically present in the solid aerosol particles (Cu, Cd, Pb). The 4<sup>th</sup> group includes  
240 major constituents of carbonate or marine aerosols matrix (elevated pH, Mg, Ca and Na). The 5<sup>th</sup> group is represented

241 by typical macro- and micronutrients (K, Rb, Mn, Co, Ba). Finally, the last 6<sup>th</sup> group of elements comprises both labile  
242 elements linked to weatherable minerals (Sr, Sb, Si, Ni) and nutrients such as Sr, Ni, Si, DOC and Mo. Three of these  
243 elements are strongly enriched in snow particles relative to the Earth crust (Sr, Sb, Mo, see section 3.3 below), thus  
244 suggesting their possible leaching from atmospheric dust into the soluble fraction of snow. We could not find a  
245 straightforward explanation of the common group of Zn and U in soluble snow fraction (**Fig. 3 B**)

246 The effect of particulate fraction on dissolved element composition in snow is illustrated in **Fig. 4** where the  
247 value of pH (**4 A**), Sr (**4 B**), Al (**4 C**) and Pb (**4 D**) in dissolved fraction are plotted as a function of total particle  
248 concentration in snow water. The elements of 4<sup>th</sup> and 5<sup>th</sup> group (Ca, Mg, Sr, Mn, and Co) increase their concentration in  
249 snow water by ca. an order of magnitude with the increase in particle concentration by 2 orders of magnitude. The  
250 insoluble hydrolysates (Fe, Al, light REEs, Zr, Cu and Pb) belonging to 1<sup>st</sup> and 2<sup>nd</sup> HCA group decrease their  
251 concentration (less than a factor 10) when the particle concentration increases by 2 orders of magnitude. Other elements  
252 in < 0.45 µm fraction exhibit the variations within an order of magnitude (DOC, DIC, Na, Cl, SO<sub>4</sub>, K, Si, Cr, V, Ni, Cu,  
253 Zn, As, Sb, Rb, Cd, Cs, Ba, heavy REE and U) or two orders of magnitude (Ti, Ga, Mo, W) and do not demonstrate any  
254 significant (at p < 0.05) link with particle concentration.

### 255 256 **3.2. Particle concentration and TE in particulate fraction of snow**

257 Concentration of particulate fraction (PF) of snow and its elementary composition are available in the “Data  
258 availability” section. The mineralogical composition of most representative snow samples is given in **Table S1** of the  
259 Supplement. The dominant minerals are quartz (37%), albite (13%), K-feldspar (13%), phlogopite (10%), chrysotile  
260 (8%), illite (7%), and chlorite (5%). The concentration of dolomite and calcite ranges from 1 to 48 and 1 to 19%,  
261 respectively. Although mineral components dominated the composition of particulate fraction, the PF also contained  
262 organic fibers, diatom frustules, pollens and particles produced during fuel burning (fly ash and black carbon). The  
263 concentration of particles in snow water ranged from 0.4 to 67 mg/L. The highest values are encountered in the vicinity  
264 of the Tomsk city (No SF 1) and around towns of Surgut (No SF 54, 14), Nojabrsk (SF 36, SF 38) and Gubkinsky (SF  
265 33). Although the proportion of fly ash and black carbon in these samples is significant and higher than in the rest of  
266 samples as follows from SEM observation, the mineral particles (1-25 µm size) still dominate. Note that high content of  
267 fly ash and fuel burning spheres was not linked (p > 0.05) to high particulate and dissolved elements. The lowest  
268 concentrations of particles (< 5-10 mg/L) were recorded north of 65°N, the region of gas industry, and between 58 and  
269 61°N corresponding to the winter road along the Ob River with very low population density.

270 The enrichment coefficient ranged from ~1–5 (Ga, REEs, Fe) to > 100 (Mo, W, As, Sb, Ni, Cu, Pb, Mg, Ca, Na)  
271 as illustrated in **Fig. 5 A**. The highest enrichment (EF ≥ 1000) is observed of Sb, Zn and Cd. The variation of the  
272 enrichment factor as a function of latitude is shown for elements most enriched in particulate fraction in **Fig. S1 of**  
273 **Supplement**. For Mg, Ca, Sr, Ba, Fe, Mn, Co, Ni, K, Rb, Cs, V, Cr, As, Cd, W the EF exhibits a maximum around 63-  
274 64.5°N. This maximum coincides with the maximum of particulate fraction concentration (not shown).

275 The majority of chemical elements are present in particulate rather than dissolved form in snow meltwater  
276 samples. This is illustrated by a histogram of the ratios averaged over full latitudinal profile (**Fig. 5 B**). Although the  
277 variations of this ratio for different snow water samples across the WSL achieve ±0.5 order of magnitude, the average  
278 values shown in this figure illustrate the importance of particulate deposition of Al, Fe, Ga, REEs, Cr, V, Ti, Zr, Mo and  
279 W. For other elements, particulate and dissolved inputs in the form of snow are within the same order of magnitude.  
280 Some soluble elements such as Na, Cd, Ca, Sr, Ba, K, As and Zn exhibit the dominance of dissolved transport in snow.

281 Although the use of average crust for assessment of element enrichment in snow particles is justified by long-  
282 range transfer of snow components, it is known since the works of group of Reimann and de Caritat in NW Europe that

283 the “average crust” is unlikely to represent the local background and the use of the “upper crust” average value can  
284 introduce a 2 to 3 order of magnitude uncertainty to any calculated EF (de Caritat et al., 1997; Reimann and de Caritat,  
285 2000; Reimann et al., 2000). As such, western Siberia moss, peat and clay/loam horizons were used to assess relative  
286 enrichment of elements in snow particles. It can be assumed that the leaching of soluble forms of elements from these  
287 solid phases in winter is highly unlikely. The specificity of western Siberia is that the mineral (“geological”) local  
288 substrate is completely frozen, even in summer, since the active (unfrozen) layer depth does not exceed the peat  
289 thickness, and in that case, the use of “organic” substrates is most relevant. All three WSL reference substances (“local”  
290 moss, peat and clays) represent latitudinal-averaged values based on large (> 50) number of samples collected in  
291 previous studies across the 1700-km latitudinal gradient.

292 The elementary ratios of snow particles to that in mineral soil, peat and moss of the WSL are illustrated in **Fig. 6**  
293 **A, B, and C**, respectively. Given significant variation on the latitude-averaged values of element concentration in snow  
294 particles, mineral, peat and moss of soil column, the deviation of the ratios from unity is significant if it exceeds a factor  
295 of 2 to 3. Compared to mineral soil of WSL, the snow particles are strongly ( $\geq 10\times$ ) enriched in Sb, Zn, Ni and Cd and  
296 in a lesser degree ( $\geq 5\times$ ) in Mg, Ca, Pb, Mo, and As (**Fig. 6 A**). Note that western Siberian soils, developed on sand and  
297 clay (silt) deposits (Vasil’evskaya et al., 1986), are quite poor in Ca and Mg, especially in the permafrost-bearing zone  
298 north of 62°N. The enrichment of snow particles relative to peat is observed for all elements, being particularly high (>  
299 50 $\times$ ) for Ni, Cr, Pb, Cu, Zn, Mg, Na and Sb (**Fig. 6 B**). Only P, Ge and Cd, exhibiting high affinity to peat (Shotyk et  
300 al., 1990, 1992), are not significantly ( $p > 0.05$ ) higher in snow particles compared to the peat column. Finally, the  
301 mosses are most depleted by all elements relative to snow PF with only biogenic elements (P, K, Rb, Mn and Cd)  
302 known to be concentrated in bryophytes being non-significantly higher in snow particles relative to mosses (**Fig. 6 C**).

303 The PCA of elementary composition of particulate fraction demonstrated the F1 x F2 structure (**Fig. S2 A** of the  
304 Supplement). Here, two groups can be distinguished: highly mobile elements (Na, Ca, V, Ni, Mg, Mn) and low mobile  
305 elements (REE, Zr, Pb, Cd, Ga, P). For the particulate fraction, the HCA attributed the elements to 5 formal groups  
306 shown in **Fig. S2 B** and encircled in **Fig. S2 A**. This distinction, however, is less certain than that of the dissolved  
307 fraction and does not allow establishing a clear link between the selected groups and physico-chemical properties of  
308 elements or their possible sources in the snow particles. Thus, in the 1<sup>st</sup> group, among three labile elements (Mg, Na and  
309 Ca) we identified V, which may exhibit elevated mobility in the form of anion in carbonate-bearing mineral particles.  
310 Divalent metals (Co, Ni, Mn) and Sr constitute the 2<sup>nd</sup> labile group of elements, yet this group also comprises low-  
311 mobile Fe and Cr. The 3<sup>rd</sup> group of insoluble low mobile elements is marked by the presence of phosphates (REE and  
312 P), refractory Zr and volatile Pb. The 4<sup>th</sup> group of elements revealed by HCA of particles is composed of Sb, Cu and Zn.  
313 All these elements are strongly enriched in snow particles over the soil minerals (see **Fig. 6 A**). The last group of  
314 elements in snow particles comprises both labile (Li) and biologically-important Mo, K, Rb, Ba, toxic volatile elements  
315 which could bear the signature of anthropogenic pollution (As, Cd) but also low mobile Ti and Ga. We could not  
316 identify the link of elements in this group to the degree of snow particles enrichment relative to main “local” substrates  
317 of the WSL (moss, peat and clays), shown in **Fig. 6**.

318

319

### 320 **3.3. Possible impact of snow deposition on major and TE in lakes and rivers.**

#### 321 3.3.1. Snow water in comparison to lake and river water

322 The concentrations of dissolved major and trace element in snow water fraction can be compared with those in  
323 thermokarst (thaw) lakes of western Siberia measured in 2013-2014. These lakes are shallow (0.5-1.5 m depth) water  
324 bodies representing the largest reservoir of surface waters in western Siberia, north of 62°N (Polishchuk et al., 2017).



325 The average concentration of major and TE in thermokarst lakes of various size (Manasypov et al., 2014) can be  
326 compared with those in snow water collected in this study across the same latitudinal gradient. Because the size of  
327 thermokarst lakes of WSL ranges from few m<sup>2</sup> to several km<sup>2</sup>, 4 representative ranges of lake diameters are used for this  
328 comparison (0-10, 11-100, 101-500 and > 500 m). Given that the spring-time lake concentrations across the latitudinal  
329 gradient are not available, the summer-time elementary compositions of lakes were taken as most representative for the  
330 open water period of the year. The concentrations of low-soluble elements such as Fe, Al, trivalent and tetravalent  
331 hydrolysates in lakes are 1 to 2 order of magnitude above their concentrations in snow (not shown). At the same time,  
332 Zn, Cu, Cd, Pb, Sb and Mo exhibited snow-water concentrations that were comparable or significantly higher ( $p < 0.05$ )  
333 than the concentrations in lakes.

334 Because the main source of water in shallow lakes of WSL in spring is melted snow (Manasypov et al., 2015),  
335 we could compare the mean concentrations of snow water with spring-period lake water concentration for one particular  
336 region of discontinuous permafrost zone (town of Nojabrsk, Khanymey site) for which high-resolution seasonal  
337 observations on lakes of various size are available. For two classes of lake size (< 0.5 km<sup>2</sup> and > 0.5 km<sup>2</sup>), the following  
338 three groups of elements could be distinguished. The concentrations of dissolved Na, Mn, Zn, As, Rb and Sr in snow  
339 water are similar (within a factor of 2) to lake water concentrations. Concentrations of DIC, Cl, SO<sub>4</sub>, Mg, Ca, Cr, Co,  
340 Ni, Cu, Mo, Cd, Sb, Cs, W, Pb and U in snow are close or higher ( $p < 0.05$ ) than those in lakes. And finally,  
341 concentrations of DOC, Al, Si, K, Ti, V, Fe, Ga, Zr, Ba, and REEs in snow water are significantly lower than the lakes'  
342 concentrations. There was no distinction of elements belonging to individual groups of the HCA and this classification.

343 The concentrations of elements in snow water could be also compared with river water concentrations measured  
344 during spring flood 2014 across the full latitudinal profile, since such data for rivers of different size are available  
345 (Pokrovsky et al., 2015, 2016a). Examples of elements whose concentrations in snow water are higher or comparable  
346 with those in rivers during spring flood are illustrated in Fig. S3. Generally, the effect of snow melt is mostly  
347 pronounced north of 64°N. During this period, when the rivers are essentially fed by melted snow, the atmospheric  
348 deposition exhibited comparable or higher ( $p < 0.05$ ) concentrations of SO<sub>4</sub>, Cr, Co, Ni, Cu, Zn, Mo, Cd, Sb, Cs, W and  
349 Pb than those in rivers. These elements belonged to 5 dominant groups of HCA treatment. The concentrations of all  
350 other elements in WSL rivers cannot be explained by solely snow water concentration.

351 Note that, by filtering the snow and the lake/river water to 0.45 μm, the dissolved fraction includes a colloidal  
352 load, which can play a crucial role in the concentration of trace elements (Pokrovsky et al., 2016b). However, with  
353 typical concentration of DOC in snow water around 1-2 mg/L, the share of colloidal forms of metals will be an order of  
354 magnitude lower than that in river and lakes of the WSL having 10 to 30 mg/L of DOC.

355

### 356 3.3.2. Comparison of river fluxes in spring and snow water stock

357 Considering the mass balance calculation of snow melt influence on element fluxes in WSL rivers, the ratios of  
358 river fluxes in May-June to snow stock can be presented in the form of histograms for 3 latitudinal zones (Fig. 7). These  
359 ratios systematically decrease with the increase in the latitude. In the southern, permafrost-free zone, Zn, Cd, Pb, Ga,  
360 Cs, W, Sb and Cl fluxes in rivers can be provided essentially by snow melt. The riverine fluxes of DIC, Cl<sup>-</sup>, SO<sub>4</sub><sup>2-</sup>, Na,  
361 Mg, Ca, Sr, Rb, Cs, Zn, Cu, Cr, Ni, Cu, Pb, As, Sb, Mo, W and U are strongly (i.e.,  $\geq 50\%$  at  $p < 0.05$ ) affected by snow  
362 melt in the discontinuous and continuous permafrost zones, north of 60-62°N.

363 According to the evolution of the ratio [river flux] / [snow stock] with the latitude, three group of element can be  
364 distinguished: (i) elements that steadily decrease this ratio suggesting an increase in the impact of snowmelt northward:  
365 DOC, SO<sub>4</sub>, Al, Ti, V, Cr, Rb, Sr, Cd, Sb, Cs, La, Ce, W, Pb; (ii) elements for which this ratio decreases abruptly to  
366 62±2°N and then remains constant further northward: DIC, Na, Mg, Si, K, Ca, Ni, Cu, As, Mo and U; (iii) elements

367 exhibiting non-systematic variation of the ratio with latitude but having strong (> 50%) impact of snowmelt on river  
368 fluxes (Cl, Co, Zn, Ga) and (iv) elements having negligible (< 10 %) impact of snowmelt on river fluxes (Mn, Fe, Zr  
369 and Ba). Overall, the impact of snow melt on river export fluxes in spring strongly increases northward for DIC, Cl<sup>-</sup>,  
370 SO<sub>4</sub><sup>2-</sup>, Na, Mg, Ca, Cd, Pb, Sb, Cr, Cu, Ni, As, Mo, Rb, U. Although these elements belong to all 5 major groups of  
371 cluster analysis (Fig. 3 B), they can be characterized as soluble (highly labile) elements, originated either from marine  
372 aerosols or from leaching from soluble minerals such as carbonates, and also include volatile constituents of the  
373 atmospheric aerosols (Cd, Pb, Sb, As).

## 374 375 376 **4. Discussion**

### 377 **4.1. Dissolved major and trace elements in Siberian snow**

378 In accord with general knowledge of the Arctic aerosol chemistry (Barrie, 1986; Barrie and Barrie, 1990; Laing  
379 et al., 2014, 2015; Nguyen et al., 2013; Pacyna and Ottar, 1989; Shevchenko et al., 2003; Weinbruch et al., 2012), the  
380 principal component structure of snow water chemistry identified the combination of lithogenic source (dust and soil  
381 particles dissolution, providing low-mobile, insoluble elements such as Al, Fe, Cr, Zr, REEs) and marine aerosols  
382 (soluble forms, providing high concentration of mobile elements such as Ca, Mg, Na, Mo, Ni). The latter may also  
383 originate from aeolian transport of carbonate-rich soils. The biogenic component may include Mn, Zn, K, Rb, DOC, Si  
384 whereas the anthropogenic pollution originates from coal combustion (Sb, Co) and heating systems, gas flaring at the  
385 gas oil production site as well as non-ferrous metal-smelter industry (Sb, Zn, Vinogradova et al., 1993) and ground  
386 transportation (Pb, Cu, Zn, Cr, Ni, As, Rossini Oliva and Fernández Espinosa, 2007; Sutherland et al., 2000).

387 The soluble highly mobile elements such as alkali and especially alkaline-earth elements, Sb, Mo, W and U  
388 demonstrated an increase in their dissolved (< 0.45 µm) concentration with the increase in the total particulate fraction  
389 (Fig. 4 B). We interpret this increase in concentration, also correlated with pH<sub>snow water</sub> increase (Fig. 4 A), as a result of  
390 element leaching from soluble minerals such as calcite and dolomite. There was a positive (R<sup>2</sup> = 0.53, p < 0.05)  
391 correlation between % of calcite in the particulate fraction of snow and Ca concentration in snow meltwater (not  
392 shown). Therefore, we hypothesize that simultaneous mobilization of carbonate minerals and soluble elements from the  
393 soil and rocks to the atmosphere occurs in southern, carbonate-rock bearing provinces where the winter aerosols are  
394 generated. The generation of insoluble elements such as trivalent and tetravalent hydrolysates in dissolved fraction of  
395 snow occurs independently of snow enrichment in solid particles. Indeed, the decrease, and not increase in insoluble  
396 elements dissolved concentration with the increase in particle concentration (Fig. 4 C, D) suggests that these elements  
397 are not desorbed or leached from mineral particles, either within the origin of aerosol formation or during snow melting  
398 and filtration in the laboratory.

399 Regional background concentrations of dissolved metals in snow of Quebec, Canada are reported to be 1.1, 1.7,  
400 and 1.6 mg/L<sub>meltwater</sub> for Cu, Pb, and Zn, respectively (Telmer et al., 2004). The values for Cu and Pb are comparable  
401 with average snow water concentration across the WSL (0.83 and 0.68, respectively) but the concentration of Zn in the  
402 WSL snow is significantly higher (10.1±5.0 µg/L, excluding 3 contaminated samples near the Tomsk city). Background  
403 concentrations of dissolved Cu, Pb, and Zn in snow of Alaskan Arctic are much lower (0.08, 0.09 and 1.2, respectively,  
404 Snyder-Conn et al., 1997). In snow from background areas of north-eastern European Russia, the concentrations of  
405 dissolved Cu are near at the same level as in snow from the WSL, whereas the concentrations of dissolved Pb and Zn  
406 are 2 times lower (Walker et al., 2003). Concentrations of dissolved Cu and Zn in snow of NW Finland are few times  
407 lower than in snow of WSL; concentrations of dissolved Pb are at the same level (Caritat et al., 1998).

408 Significant enrichment in Ni is known for the aerosols of the Arctic Ocean (Shevchenko et al., 2003). It may be  
409 linked both to Ni transport from Norilsk and Kola smelters but also with Ni fractionation at the sea surface (Duce et al.,  
410 1976). Ni concentration in snow water of the northern part of WSL significantly exceeds that in the thermokarst lakes.  
411 The winter snow stock of dissolved Ni is several times higher than the river export of this element during spring flood  
412 in the permafrost-bearing zone of the WSL, north of 60°N, and Ni concentration in snow particles exceeds up to 2  
413 orders of magnitude its concentration in moss and peat of the territory.

414 The winter-time deposition of dissolved (< 0.45 µm) metals on the surface of northern part of the WSL can be  
415 calculated taking into account the mean multi-annual volume of accumulated snow during 8 winter months (in mm of  
416 snow water) and the average concentration of elements in February snow collected north of 64°N. The monthly  
417 depositions of selected metals (µg m<sup>-2</sup> month<sup>-1</sup>) on the north of the WSL in the form of snow are equal to 2.8, 12, 15,  
418 210 and 0.9 for As, Ni, Pb, Zn, and Cd which is significantly higher than the values for winter deposition of insoluble  
419 aerosols into the Russian Arctic (0.22, 0.74, 2.7, 1.3 and 0.056, respectively, Shevchenko et al., 2003). Only V exhibited  
420 similar values of Arctic aerosol and snow deposition (0.71 and 0.96 µg m<sup>-2</sup> month, respectively).

421  
422

#### 423 **4.2. Particulate forms of elements in the snow across the latitudinal profile: the effect of mineralogical** 424 **substrate, industrial centers, local pollution and long-range transport.**

425 The majority of elements are transported in particulate rather than dissolved fraction in the snow water (Fig. 5  
426 B). This is in general agreement with the results of other studies in Scandinavia and Kola Peninsula (Reimann et al.,  
427 1996), north-eastern European Russia (Walker et al., 2003) and on drifting ice in the northern Barents Sea (Gordeev and  
428 Lisitzin, 2005). The enrichment of snow particulate fraction relative to the earth crust as shown by Al-normalized  
429 enrichment coefficient (Figs. 5 A, S1) can be understood via taking into account the particle concentration in snow and  
430 microscopic observations. We suggest that the clays supply most trace elements in the PF. The atmospheric particles are  
431 known to exert significant impact on soils and ground vegetation (Kabata-Pendias and Pendias, 1984; Rasmussen, 1998;  
432 Steinnes and Friedland, 2006). In the case of WSL, the elementary composition of snow particulate fraction was  
433 compared with three main reservoirs of elements within the soil, sampled over significant latitudinal profile, from 55°N  
434 to 68°N (Stepanova et al., 2015). These reservoirs are averaged over full latitudinal range and include *i*) mineral fraction  
435 from the bottom of the peat column; *ii*) depth-averaged peat column composition, and *iii*) *Sphagnum* mosses, collected  
436 in ombrotrophic bogs, which receive their constituents essentially from the atmosphere (e.g., Santelman and Gorham,  
437 1988).

438 The particularity of the northern part of western Siberia lowland is that the active (seasonally unfrozen) soil layer  
439 is located within the organic (moss+peat) rather than mineral horizon; the latter is represented by poorly reactive sands  
440 and clays (Baulin et al., 1967; Baulin, 1985; Tyrtikov, 1973, 1979). As a result, the surface waters drain essentially  
441 organic part of the column which is very poor in lithogenic elements (Pokrovsky et al., 2015, 2016a). The supply of  
442 mineral particles from the snow therefore may significantly enrich the rivers and lakes in dissolved alkaline earths,  
443 metal micronutrients, phosphorus and other elements given high reactivity of incoming silicate and carbonate grains in  
444 acidic (pH < 3-4), organic-rich (10 < DOC < 50 mg/L) surface waters of Western Siberia. The degree to which such a  
445 supply can lead to overestimation of the calculated chemical weathering export fluxes of cations in the permafrost zone  
446 is not possible to quantify. Therefore, in view of the importance of atmospheric input of solid particles for mineral-poor,  
447 peat bogs of western Siberia, the seasonal, year-round measurements of particulate atmospheric deposition in this region  
448 are necessary.

449

450 The main source of mineral particles in the southern part of latitudinal profile (56–58°N) may be soils of steppe  
451 and forest-steppe regions south of WSL, where the land is cultivated and the snow cover is relatively thin. The aeolian  
452 transport of soil particles under these conditions may be efficient even in winter (Evseeva et al., 2003). The main source  
453 of ash particles in southern part of the profile is the industry and transport of the city of Tomsk (Boyarkina et al., 1993;  
454 Yazikov et al., 2000; Talovskaya et al., 2014). The concentration of particles in snow collected from 58°N to 61°N  
455 ranged between 0.85 and 5.72 mg/L which is comparable or slightly higher than the values reported for the Arctic snow  
456 cover (Darby et al., 1974; Mullen et al., 1972; Nürnberg et al., 1994; Shevchenko et al., 2002, 2010). It is important that  
457 in this zone of low PF concentration, combustion spheres, fly ash and black carbon of few  $\mu\text{m}$  diameters were  
458 dominating. This can explain relatively low concentration of all TE at low PF concentration, as carbon compounds  
459 likely contain very low proportion of trace metals. The most important sources of fly ash and black carbon are gas  
460 flaring, land transport, heating plants, residential combustion, forest fires (mainly in summer) and industrial plants  
461 (Moskovchenko and Babushkin, 2012; Quinn et al., 2008; Stohl et al., 2013). Chemical pollution of atmosphere during  
462 gas flaring associated with oil industry is known for the WSL (Raputa, 2013; Yashchenko et al., 2014). The black  
463 carbon produced during gas burning is detected not only in western Siberia but in the Russian sector of the Arctic Ocean  
464 in high latitudes (Stohl et al., 2013).

465 In the zone 62–64.5°N, where some impact of oil industry is possible, the concentration of insoluble particles in  
466 snow were above 10 mg/L, achieving the value of 66.6 mg/L in sample SF36. Backward trajectories to this site using  
467 Draxler and Rolf (2003) approach show that, during last few days before sampling, the air masses arrived from south-  
468 western direction. Accordingly, the particulate fraction in these samples contained mostly mineral particles 1–25  $\mu\text{m}$   
469 size with some fly ash (burning spheres). It is possible that mineral particles are supplied here via long-range transport  
470 from forest-steppe, steppe and semi-desert regions south and south-west from the study site. Indeed, during winter snow  
471 coverage period, the dominant winds in this zone have S, SW and W directions (Moskovchenko and Babushkin, 2012).  
472 The events of mineral dust transport over large distances are well known in the boreal zone (Lisitzin, 1978, 2011;  
473 Shevchenko et al., 2010).

474 Further north of studied latitudinal profile, from 65 to 68°N, the concentration of snow particles ranged from 0.8  
475 to 9.2 mg/L. These values are within the background in the Arctic and subarctic (Darby et al., 1974; Mullen et al., 1972;  
476 Nürnberg et al., 1994; Shevchenko et al., 2002). The particulate fraction was represented by mineral debris of 1 to 15  
477  $\mu\text{m}$  in size, with frequent but not significant presence of spherical ash particles, biogenic strains and porous carbon  
478 particles. Because the main source of mineral particles is long-range transport from southern desert and steppe regions,  
479 moving to the north decrease the influence of these provinces.

480 We believe that the elevated concentrations of divalent metals, As and Sb in snow particles (Fig. 5 A, S1) should  
481 not be interpreted as necessarily pollution from the industrial centers. Rather, volatile Pb, Cd, As may originate from  
482 long-range transport of desert material. Therefore, we attempted to distinguish the well-known refractory, non-volatile  
483 heavy metals such as Cu, Ni and Co and more volatile elements such as Pb, Cd and As (i.e., Reimann et al., 2000) based  
484 on the HCA treatment. For both particulate and dissolved fraction, these elements are located in three or two different  
485 groups but never belong to one single group of inter-correlated elements. As such the available data do not evidence  
486 similar origin of Cu, Ni and Co, or Pb, Cd, and As in the snapshot of WSL snow sampled in this work.

487  
488  
489  
490  
491

#### 4.3. Impact of snow on hydrochemistry of inland waters and riverine elementary fluxes.

Quantitative comparison of element input to the land surface with winter snow and element concentration and fluxes in the WSL inland waters provided the assessment of minimal atmospheric contribution to lake storage and river export. The concentrations of Pb, Zn, Cu, Cd, Sb and Mo in lakes are significantly lower than those in snow. However, these elements belong to 4 various group of elements in dissolved snow fraction, identified by the HCA (Fig. 3 B). In rivers, SO<sub>4</sub>, Cr, Co, Ni, Cu, Zn, Mo, Cd, Sb, Cs, W and Pb are dominated by snow input. These elements also belong to 4 various group of the HCA. It thus can be concluded that there is no direct link between the group of elements identified by cluster dendrogram in the snow water and the elements whose concentration in rivers or lakes are significantly affected by snow deposition. We believe that a natural cause of this apparent inconsistency is different mechanisms controlling the element distribution in the aerosols (local sources of pollution, remote desert provinces, leaching of soluble elements from particulate fraction) and surface waters (interaction of melted snow with upper peat and moss/lichen horizons; underground feeding, release of elements from silicate river suspended matter due to abrasion in spring flood).

Overall, the impact of the snowmelt on chemical composition of western Siberian thermokarst lakes may be very high. This will be further accentuated by reported increase in the proportion of meltwater that does not reach the main rivers but is stored by the wetlands (i.e., from 20-30% in early 1990s to 50-60% in the mid-2000s, Zakharova et al., 2011). A comparison of snow stock/river water fluxes demonstrates the increase in the influence of atmospheric deposition northward (Fig. 7). At the same time, the chemical composition of the snow water, although subjected to significant variation, does not exhibit any systematic trend with the latitude (Fig. 2) as also follows from the PCA (section 3.1). The reason for this difference may be relatively low fluxes and concentrations in rivers of the northern, permafrost-affected territory of the WSL compared to the southern, permafrost-free zone (Pokrovsky et al., 2015, 2016a). As a result, the impact of atmospheric deposition on the riverine transport is more pronounced in the permafrost zone than in the permafrost-free zone. We expect this effect to be quite general for flat bog tundra areas of northern Eurasia, including, in addition to northern part of western Siberia (~400,000 km<sup>2</sup>) studied in this work, the Yamal and Gyda Peninsula (122,000 and 160,000 km<sup>2</sup>, respectively), the North-Siberian Lowland (~700,000 km<sup>2</sup>), the Kolyma Lowland (170,000 km<sup>2</sup>), and the Yana-Indigirka Lowland (180,000 km<sup>2</sup>) with overall territory close to 1.7 million km<sup>2</sup>. The impact of snow deposition on river elementary fluxes should be much lower in permafrost-bearing mountainous terrain such as Central and Eastern Siberia, the Alaskan slopes, north of Scandinavian shield and the Canadian High Arctic. In those territories, two factors may decrease the contribution of snow deposition to river fluxes: 1) the impact of local mineral dust for aerosols generation may be well pronounced and 2) the chemical weathering occurs within the mineral seasonally unfrozen layer producing higher fluxes of inorganic components.

In contrast, in the lowlands of Northern Eurasia, the rivers drain essentially organic layer (peat bog) terrain, thus mineral feeding of rivers is really low. As it is demonstrated in section 3.3.2 of this study, low chemical (cationic) weathering in the north of the WSL during spring suggests that total dissolved cationic and DIC fluxes in May-June in this and other similar regions are essentially controlled by snowmelt, rather than by weathering. It follows that during the spring period, the intensity of chemical weathering in these latitudes can be a factor of 2 (major cations) to 5 (TE) lower than that deduced from riverine fluxes. However, given that the shares of spring flood period (May-June) in the annual export fluxes are only 5 to 10% for major cations and 10 to 20% for TE (Pokrovsky et al., 2015, 2016), the overall impact of atmospheric deposits on element export fluxes will be strongly pronounced (i.e.,  $\geq 50\%$  of total measured river flux value) only for elements which have the ratio of the spring-time river export to snow stock less than 0.2, i.e., SO<sub>4</sub>, Cu, Mo, Cd, Sb, Cs, W and Pb. With further increase of winter precipitation in western Siberia (i.e.,

533 Bulygina et al., 2009), the impact of snowmelt on element transport to the Arctic Ocean by rivers may increase thus  
534 enriching the surface waters in many elements such as Cd, Pb, Sb, Cr, Cu, Ni, As, Mo, Rb, U.

535

536

### 537 **Conclusions**

538 The chemical composition of surface layer of snow cover was studied across a 1700-km latitudinal gradient in  
539 western Siberia Lowland. The particulate fraction ranged from 0.4 to 66 mg/L<sub>meltwater</sub> and increased in the regions of  
540 enhanced dust deposition from southern steppe and desert provenances, in the proximity of industrial centers and due to  
541 fly ash production from gas burning of the oil exploration sites. There was an increase in concentration of soluble  
542 elements (Ca, Mg, Sr, Mn, Co) and pH in snow water with the increase in mineral (calcite, dolomite) fraction. The  
543 elementary composition of PF demonstrated its significant enrichment in most elements relative to mineral soil horizon,  
544 peat and moss across full latitudinal profile (~1700 km) of WSL. As such, solid atmospheric aerosols may be important  
545 factor of insoluble element delivery to the soil surface. The supply of mineral particles from the snow may also  
546 significantly enrich the rivers and lakes in dissolved alkaline earths, metal micronutrients, phosphorus and other elements  
547 given high reactivity of incoming silicate and carbonate grains in acidic (pH < 3-4), organic-rich (10 < DOC < 50 mg/L)  
548 surface waters of Western Siberia.

549 Concentrations of Na, Mn, Zn, As, Rb and Sr in winter aerosols are similar (within a factor of 2) to lake water  
550 concentrations during spring period. Concentrations of DIC, Cl, SO<sub>4</sub>, Mg, Ca, Cr, Co, Ni, Cu, Mo, Cd, Sb, Cs, Pb and U  
551 in filtered snow water are close or higher than those in lakes. In the southern, permafrost-free zone, only Zn, Cd, W, Pb,  
552 Cs and Sb fluxes in rivers during May-June period can be provided by dissolved fraction of the snow melt. However,  
553 the impact of snow melt on river export fluxes in spring strongly increases northward for DIC, Cl, SO<sub>4</sub>, Na, Mg, Ca, Cd,  
554 Pb, Sb, Cr, Cu, Ni, As, Mo, Rb, U. In the permafrost zone, ≥ 50% of riverine fluxes of these elements during spring  
555 flood can be provided by the snowmelt. The reason for such high sensitivity of WSL surface reservoirs to atmospheric  
556 deposition is feeding of surface waters by essentially organic (moss, peat) soil profiles.

557

### 558 **Data availability**

559 Full data set of major and trace element concentration in snow water (< 0.45 μm) and snow particles sampled  
560 across the latitudinal profile of Western Siberia Lowland is available at the Research Gate,  
561 <https://www.researchgate.net/publication/309666956>; DOI: 10.13140/RG.2.2.12156.54408.

562

### 563 **Acknowledgements:**

564 This work was supported from the BIO-GEO-CLIM grant No 14.B25.31.0001 of Russian Ministry of Science and  
565 Education. RM and LS acknowledge support from RSCF (RNF) grant No 15-17-10009. Supports from GDRI CAR-WET-  
566 SIB, RFBR Nos 17-55-16008, 17-05-00348\_a, FCP “Kolmogorov” No 14.587.21.0036, and Program 32 of Fundamental  
567 Research of Presidium of Russian Academy of Sciences are also acknowledged. We would like to thank Academician A.P.  
568 Lisitzin for valuable recommendations, J. Prunier, M. Henry, A. Lanzaova for help in analytical work. The authors  
569 acknowledge the NOAA Air Resources Laboratory (ARL) for the provision of the HYSPLIT transport model and READY  
570 website (<http://www.arl.noaa.gov/ready.html>).

571

572

- 574 Ariés, S., Valladon, M., Polvé, M., and Dupré, B.: A routine method for oxide and hydroxide interference  
 575 corrections in ICP-MS chemical analysis of environmental and geological samples, *Geostandards Newslett.*, 24, 19–31,  
 576 doi: 10.1111/j.1751-908X.2000.tb00583.x, 2000.
- 577 Baltrėnaitė, E., Baltrėnas, P., Lietuvninkas, A., Šerevičienė, V., and Zuokaitė, E.: Integrated evaluation of aerogenic  
 578 pollution by air-transported heavy metals (Pb, Cd, Ni, Zn, Mn and Cu) in the analysis of the main deposit media, *Environ.*  
 579 *Sci. Pollut. Res.*, 21, 299–313, 2014.
- 580 Barrie, L. A.: Arctic air pollution: an overview of current knowledge. *Atmospheric Environment*, 20, 643–663,  
 581 1986.
- 582 Barrie, L. A., Barrie, M. J.: Chemical components of lower tropospheric aerosols in the high Arctic: Six year of  
 583 observation, *J. Atmos. Chem.*, 11, 211–226, 1990.
- 584 Baulin, V. V.: Permanently frozen rocks of oil and gas producing regions of the USSR. Nauka: Moscow (in  
 585 Russian), 1985.
- 586 Baulin, V. V., Belopukhova, E. B., Dubikov, G. I. and Shmelev, L. M.: Geocryological conditions of western  
 587 Siberia Lowland, Nauka, Moscow (in Russian), 1967.
- 588 Beilman, D. W., MacDonald, G. M., Smith, L. C., and Reimer, P. J.: Carbon accumulation in peatlands of West  
 589 Siberia over the last 2000 years, *Global Biogeochem. Cycles*, 23, GB1012, doi:10.1029/2007GB003112, 2009.
- 590 Bini, C., Sartori, G., Wahsha, M., Fontana, S.: Background levels of trace elements and soil geochemistry at  
 591 regional level in NE Italy. *J. Geochemical Explor.* 109, 125–133. <http://dx.doi.org/10.1016/j.gexplo.2010.07.008>, 2011.
- 592 Bokhorst, S., Pedersen, S. H., Brucker, L., Anisimov, O., Bjerke, J. W., Brown, R. D., Ehrich, D., Essery, R. L. H.,  
 593 Heilig, A., Ingvander, S., Johansson, C., Johansson, M., Jónsdóttir, I. S., Inga, N., Luoju, K., Macelloni, G., Mariash, H.,  
 594 McLennan, D., Rosqvist, G. N., Sato, A., Savela, H., Schneebeli, M., Sokolov, A., Sokratov, S. A., Terzago, S., Vikhamar-  
 595 Schuler, D., Williamson, S., Qiu, Y., and Callaghan, T. V.: Changing Arctic snow cover: A review of recent developments  
 596 and assessment of future needs for observations, modelling, and impacts, *Ambio*, 45, 516–537, doi: 10.1007/s13280-016-  
 597 0770-0, 2016.
- 598 Botch, M. S., Kobak, K. I., Vinson, T. S., and Kolchugina, T. P.: Carbon pools and accumulation in peatlands of the  
 599 former Soviet Union, *Global Biogeochem. Cy.*, 9, 37–46, doi: 10.1029/94GB03156, 1995.
- 600 Boyarkina, A. P., Baikovsky, V. V., Vasiliev, N. V., Glukhov, G. G., Medvedev, M. A., Pisareva, L. F., Rezhnikov,  
 601 V. I., and Shelud'ko, S. I.: Aerosols in natural tablet of Siberia, Publishing house of Tomsk State University, 157 pp. (in  
 602 Russian), 1993.
- 603 Bulygina, O. N., Razuvaev, V. N., and Korshunova, N. N.: Changes in snow cover over Northern Eurasia in the last  
 604 few decades, *Environ. Res. Lett.*, 4, 045026, doi: 10.1088/1748-9326/4/4/045026, 2009.
- 605 Callaghan, T. V., Johansson, M., Brown, R. D., Groisman, P. Ya., Labba, N., Radionov, V., Bradley, R. S., Blangy,  
 606 S., Bulygina, O. N., Christensen, T. R., Colman, J. E., Essery, R. L. H., Forbes, B. C., Forchhammer, M. C., Golubev, V.  
 607 N., Honrath, R. E., Juday, G. P., Meshcherskaya, A. V., Phoenix, G. K., Pomeroy, J., Rautio, A., Robinson, D. A.,  
 608 Schmidt, N. M., Serreze, M. C., Shevchenko, V. P., Shiklomanov, A. I., Shmakin, A. B., Skold, P., Sturm, M., Woo, M.,  
 609 Wood, E. F.: Multiple effects of changes in Arctic snow cover, *Ambio*, 40 (S1), 32–45, 2011.
- 610 Caritat, P. de, Reimann, C., Chekushin, C., Bogatyrev, I., Niskavaara, H., Braun, J.: Mass balance between  
 611 emission and deposition of airborne contaminants. *Environ. Sci. Technol.* 31, 2966–2972, 1997.
- 612 Caritat, P. de, Åyräs, M., Niskavaara, H., Chekushin, V., Bogatyrev, I., and Reimann, C.: Snow composition in eight  
 613 catchments in the central Barents Euro-Arctic region, *Atmos. Environ.*, 32, 2609–2626, 1998.
- 614 Caritat, P. de, Hall, G., Gislason, S., Belsey, W., Braun, M., Goloubeva, N. I., Olsen, H. K., Scheie, J. O., and Vaive,  
 615 J. E., 2005. Chemical composition of arctic snow: concentration level and regional distribution of major elements, *Sci.*  
 616 *Total Environ.*, 336, 183–199.
- 617 Chekushin, V. A., Bogatyrev, I. V., Caritat, P. de, Niskavaara, H., and Reimann, C., 1998. Annual atmospheric  
 618 deposition of 16 elements in eight catchments of the central Barents region, *Sci. Total Environ.*, 220, 95–114, 1998.
- 619 Chessel, D., Dufour, A. B., and Thioulouse, J.: The ade4 package - I : One-table methods. *R News* Vol. 4/1, 5–10,  
 620 2004.
- 621 De la Cruz, O., and Olmes, S.: The duality diagram in data analysis: Examples of modern applications. *Annals*  
 622 *Applied Stat.*, 5(4), 2266–2277, DOI:10.1214/10-AOAS408, 2011.
- 623 Darby, D. A., Burckle, L. H., and Clark, D. L.: Airborne dust on the Arctic pack ice: Its composition and fallout rate,  
 624 *Earth Planet Sci. Lett.*, 24, 166–172, 1974.
- 625 Draxler, R. R., and Rolf, G. D.: HYSPLIT (Hybrid Single-Particle Lagrangian Integrated Trajectory). Silver Spring  
 626 (MD): NOAA Air Resources Lab. Mod access via NOAA ARL READY Website  
 627 (<http://www.arl.noaa.gov/ready/hysplit4.html>), 2003.
- 628 Duce, R. A., Hoffman, G. L., Ray, B. J., Fletcher, I. S., Wallace, G. T., Fasching, J. L., Piotrowicz, S. R., Walsh, P.  
 629 R., Hoffman, E. J., Miller, J. M., and Heffter, J. L.: Trace metals in the marine atmosphere: sources and fluxes, In:  
 630 Windom, H. L., Duce, R. A. (Eds.), *Marine Pollutant Transfer*. Lexington Books, Toronto, pp. 77–119, 1976.
- 631 Ermolov, Yu. V., Makhatkov, I. D., and Khudyaev, S. A.: Background concentration of chemical elements in snow  
 632 cover of the typical regions of the Western Siberia. *Optika Atmosfery i Okeana* 27, 790–800 (in Russian), 2014.
- 633 Evseeva, N. C., Kvasnikova, Z. N., Romashova, T. N., and Osintzeva N. V.: Aeolian erosion of soil during cold  
 634 period of the year on Tom-Yaiskoe watershed divide (Western Siberia), *Geography and Natural Resources*, No 3, 101–105,

635 2003.

636 Franzén, L. G., Hjelmroos, M., Källberg, P., Brorström-Lundén, E., Junto, S., Savolainen, A.-L.: The “yellow  
637 snow” episode of northern Fennoscandia, march 1991 – a case study of long-distance transport of soil, pollen and stable  
638 organic compounds, *Atm Environ.*, 28, 3587–3604, 1994.

639 Frey, K. E. and Smith, L. C.: How well do we know northern land cover? Comparison of four global vegetation and  
640 wetland products with a new ground-truth database for West Siberia, *Global Biogeochem. Cy.*, 21, GB1016,  
641 doi:10.1029/2006GB002706, 2007.

642 Garbarino, J. R., Snyder-Conn, E., Leiker, T. J., and Hoffman, G. L.: Contaminants in arctic snow collected over  
643 northwest Alaskan sea ice, *Water, Air, Soil Poll.*, 139, 183–214, 2002.

644 Gordeev, V. V., and Lisitzin, A. P.: Heavy metals in snow and ice cover of the Barents Sea, *Oceanology* 45 (5),  
645 737–744, 2005.

646 Gourdol, L., Hissler, C., Hoffmann, L., Pfister, L., 2013. On the potential for the Partial Triadic Analysis to grasp  
647 the spatio-temporal variability of groundwater hydrochemistry. *Appl. Geochem.* 39, 93–107.

648 Guéguen, C., Cuss, C. W., and Cho, S.: Snowpack deposition of trace elements in the Athabasca oil sands region,  
649 Canada, *Chemosphere*, 153, 447–454, doi: 10.1016/j.chemosphere.2016.03.020, 2016.

650 Hartigan, J.: *Clustering Algorithms*. John Wiley and Sons, NY, 1975.

651 Huang, Z., Huang, J., Hayasaka, T., Shanshan Wang, S., Zhou, T., and Jin, H.: Short-cut transport path for Asian  
652 dust directly to the Arctic: a case study, *Environ. Res. Lett.*, 10, 114018, 2015.

653 Kabata-Pendias, A., and Pendias, H., 1984. *Trace Elements in Soils and Plants*. CRC Press, Boca Raton, Florida,  
654 304 pp, 1984.

655 Kang, S., Zhang, Q., Kaspari, S., Qin, D., Cong, Z., Ren, J., and Mayewski, P. A.: Spatial and seasonal variations of  
656 elemental composition in Mt. Everest (Qomolangma) snow/firn, *Atmos. Environ.*, 41, 7208–7218, 2007.

657 Karnatzevich, I. V., and Khruschev, S. A.: A computer system of mass calculation of running water balances of  
658 river watersheds from poorly studied territories, Omsk, Gos Ped Institut, 174 pp, 2014.

659 Kashulina, G., de Caritat, P., and Reimann, C.: Snow and rain chemistry around the “Severonikel” industrial  
660 complex, NW Rurria: Current status and retrospective analysis, *Atmos. Environ.*, 89, 672–682, 2014.

661 Kaufman, L., Rousseeuw, P. J.: *Finding Groups in Data*. JohnWiley and Sons Inc., NY, (368pp), 2005.

662 Khrenov V. Ya.: *Soils of cryolithozone of western Siberia: Morphology, physico-chemical properties and  
663 geochemistry*, Nauka, Moscow (in Russian), 2011.

664 Krachler, M., Zheng, J., Koerner, R., Zdanowicz, C., Fisher, D., and Shoty, W.: Increasing atmospheric antimony  
665 contamination in the northern hemisphere: snow and ice evidence from Devon Island, Arctic Canada. *J. Environ. Monit.*, 7,  
666 1169–1176, 2005.

667 Laing, J. R., Hopke, P. K., Hopke, E. F., Husain, L., Durkiewicz, V. A., Paatero, J., and Viisanen, Y.: Long-term  
668 particle measurements in Finnish Arctic: Part I – Chemical composition and trace metal solubility, *Atmos. Environ.* 88,  
669 275–284, 2014.

670 Laing, J. R., Hopke, P. K., Hopke, E. F., Husain, L., Durkiewicz, V. A., Paatero, J., and Viisanen, Y.: Positive  
671 matrix factorization of 47 years of particle measurements in Finnish Arctic, *Aerosol Air Quality Res.*, 15, 188–207, 2015.

672 Levitan, D. M., Zipper, C. E., Donovan, P., Schreiber, M. E., Seal, R. R., Engle, M., Chermak, J., Bodnar, R. J.,  
673 Johnson, D. K., Aylor, J. G.: Statistical analysis of soil geochemical data to identify pathfinders associated with mineral  
674 deposits: an example from the Coles Hill uranium deposit, Virginia, USA. *J. Geochemical Explor.* 154, 238–251, 2015.

675 Lin, X., Wang, X., Zhang, B., Yao, W.: Multivariate analysis of regolith sediment geochemical data from the  
676 Jinwozi gold field, north-western China, *J. Geochem. Explor.* 137, 48–54, 2014.

677 Lisitzin, A. P.: Arid sedimentation in the oceans and atmospheric particulate matter, *Dispersed Russian Geology  
678 Geophys.*, 52(10), 1100–1133, doi: 10.1016/j.rgg.2011.09.006, 2011.

679 Lisitzin, A. P.: *Processes of Ocean Sedimentation. Lithology and Geochemistry*, Moscow, Nauka, 391 pp, 1978.

680 Lisitzin, A. P.: *Sea-ice and Iceberg Sedimentation in the Ocean: Recent and Past*, Springer, Berlin. 563 pp, doi:  
681 10.1007/978-3-642-55905-1, 2002.

682 Lisitzin, A. P., Lukashin, V. N., and Dara, O. M.: Composition and fluxes of minerals in suspended particulate  
683 matter from the water column of the Caspian Sea, *Doklady Earth Sci.*, 463(2), 733-737, doi:  
684 10.1134/S1028334X15070120, 2015.

685 Manasypov, R. M., Pokrovsky, O. S., Kirpotin, S. N., and Shirokova, L. S.: Thermokarst lake waters across the  
686 permafrost zones of western Siberia, *The Cryosphere* 8, 1177–1193, 2014.

687 Manasypov, R. M., Vorobyev, S. N., Loiko, S. V., Kritzkov, I. V., Shirokova, L. S., Shevchenko, V. P., Kirpotin, S.  
688 N., Kulizhsky, S. P., Kolesnichenko, L. G., Zemtsov, V. A., Sinkin, V. V., and Pokrovsky, O. S.: Seasonal dynamics of  
689 organic carbon and metals in thermokarst lakes from the discontinuous permafrost zone of western Siberia, *Biogeosciences*  
690 12, 3009–3028, 2015.

691 Moragues-Quiroga, C., Juilleret, J., Gourdol, L., Pelt, E., Perrone, T., Aubert, A., Morvan, G., Chabaux, F., Legout,  
692 A., Stille, P., Hissler, C.: Genesis and evolution of regoliths: Evidence from trace and major elements and Sr-Nd-Pb-U  
693 isotopes, *Catena* 149, 185–198, 2017.

694 Moskovchenko, D. V., and Babushkin, A. G.: Peculiarities of formation of chemical composition of snow waters (on  
695 example of Khanty-Mansi autonomous district), *Earth Cryosphere*, XVI, 71–81, 2012.

696 Mullen, R. E., Darby, D. A., and Clark, D. L.: Significance of atmospheric dust and ice rafting for Arctic sediment,  
697 *Geol. Soc. America Bull.* 83, 205–212, 1972.



698 Nikitin, S. P. and Zemtsov, V. A.: The variability of hydrological parameters of western Siberia, Nauka,  
699 Novosibirsk, 204 pp., 1986 (in Russian).

700 Niu, H., He, Y., Kang, S., Lu, X., Shi, X., and Wang, S.: Chemical composition of snow from Mt. Yulong,  
701 southeastern Tibetan Plateau, *J. Earth Syst. Sci.*, 125(2), 403–416, 2016.

702 Niu, H., Kang, S., Shi X., He Y., Lu X. et al.: Water-soluble elements in snow and ice on Mt. Yulong, *Sci. Total*  
703 *Environ.*, 574, 889–900, 2017.

704 Nguyen, Q. T., Skov, H., Sørensen, L. L., Jensen, B. J., Grube, A. G., Massling, A., Glasius, M., and Nøjgaard, J.  
705 K.: Source appointment of particles at Station Nord, North East Greenland during 2008–2010 using COPREM and PMF  
706 analysis, *Atmos. Chem. Phys.* 13, 35–49, 2013.

707 Novikov, S. M., Moskvina, Y. P., Trofimov, S. A., Usova, L. I., Batuev, V. I., Tumanovskaya, S. M., Smirnova, V.  
708 P., Markov, M. L., Korotkevich, A. E., and Potapova, T. M.: Hydrology of bog territories of the permafrost zone of  
709 western Siberia, BBM publ. House, St. Petersburg, 535 pp., 2009 (in Russian).

710 Nürnberg, D., Wollenburg, I., Dethleff, D., Eicken, H., Kassens, H., Letzig, T., Reimnitz, E., and Thiede, J.:  
711 Sediments in Arctic sea ice: Implications for entrainment, transport and release, *Marine Geol.*, 119, 185–214, 1994.

712 Pacyna, J. M., and Ottar, B.: Origin of natural constituents in the Arctic aerosols, *Atmos. Environ.* 23 (4), 809–815,  
713 1989.

714 Pokrovsky, O. S., Manasypov, R. M., Shirokova, L. S., Loiko, S., Krickov, I., Kopysov, S., Kolesnichenko, L. G.,  
715 Zemtsov, V. A., Kulizhsky, S. P., Vorobyev, S. N., and Kirpotin, S.N.: Permafrost coverage, watershed area and season  
716 control of dissolved carbon and major elements in western Siberia rivers. *Biogeosciences*, 12, 6301–6320, 2015.

717 Pokrovsky, O. S., Manasypov, R.vM., Loiko, S., Krickov, I. A., Kopysov, S. G., Kolesnichenko, L. G., Vorobyev,  
718 S. N., and Kirpotin, S.N.: Trace elements transport in western Siberia rivers across a permafrost gradient, *Biogeosciences*,  
719 13, 1877–1900, 2016a.

720 Pokrovsky, O. S., Manasypov, R. M., Loiko, S. V., Shirokova, L. S.: Organic and organo-mineral colloids of  
721 discontinuous permafrost zone, *Geochim. Cosmochim. Acta*, 188, 1–20, 2016b.

722 Polishchuk Y. M., Bogdanov, A. N., Polishchuk, V. Y., Manasypov, R. M., Shirokova, L. S., Kirpotin, S. N.,  
723 Pokrovsky, O. S.: Size distribution, surface coverage, water, carbon, and metal storage of thermokarst lakes in the  
724 permafrost zone of the Western Siberia Lowland, *Water*, 9, 228; doi:10.3390/w9030228, 2017.

725 Quinn, P. K., Bates, T. S., Baum, E., Doubleday, N., Fiore, A. M., Flanner, M., Fridlind, A., Garrett, T. J., Koch, D.,  
726 Menon, S., Shindell, D., Stohl, A., and Warren, S. G.: Short-lived pollutants in the Arctic: their climate impact and possible  
727 mitigation strategy, *Atmos. Chem. Phys.*, 8, 1723–1735, 2008.

728 Raputa, V. F.: Experimental and modeling studies of aerosol deposition in the vicinity of gas torch burning, *Vestnik*  
729 *NGY, Ser. Mathematics, mechanics and Informatics*, 13(3), 96-102, 2013 (in Russian).

730 Rasmussen, P. E.: Long-range atmospheric transport of trace metals: the need for geoscience perspectives, *Environ.*  
731 *Geol.*, 33 (2/3), 96–108, 1998.

732 Reimann, C., Halleraker, J. H., Kashulina, G., and Bogatyrev, I.: Comparison of plant and precipitation chemistry in  
733 catchments with different levels of pollution on the Kola Peninsula, Russia, *Sci. Total Environ.*, 243/244, 169–191, 1991.

734 Reimann, C., Niskavaara, H., de Caritat, P., Finne T.E., Äyräs, M., Chekushin, V.: Regional variation of snowpack  
735 chemistry in the vicinity of Nikel and Zapoljarnij, Russia, northern Finland and Norway, *Sci. Total Environ.*, 182, 147–  
736 158, 1996.

737 Reimann, C., de Caritat, P.: Intrinsic flaws of element enrichment factors (EFs) in environmental geochemistry,  
738 *Environ. Sci. Technol.* 34, 5084-5091, 2000.

739 Reimann, C., Banks, D., de Caritat, P.: Impacts of airborne contamination on regional soil and water quality: The  
740 Rola Peninsula, Russia, *Environ. Sci. Technol.*, 34, 2727-2732, 2000.

741 Reimann, C., Filzmoser, P., Garrett, R. G., Dutter, R.: *Statistical Data Analysis Explained: Applied Environmental*  
742 *Statistics with R. John Wiley and Sons Ltd., NY, (343pp), 2008.*

743 Reinosdotter, K. and Viklander, M.: A comparison of snow quality in two Swedish municipalities – Luleå and  
744 Sundsvall, *Water, Air, Soil Poll.*, 167, 3–16, 2005.

745 Resources of Surface Waters of USSR, Vol. 15: Altai and Western Siberia, Issue 2, Middle Ob. Ed: Panina, N. A.,  
746 Leningrad, Gidrometeoizdat, 408 pp, 1972.

747 Resources of Surface Waters of USSR, Vol. 15: Altai and Western Siberia, Issue 3, Low Irtush and Low Ob. Ed:  
748 Vodogrtesky, V. E., Leningrad, Gidrometeoizdat, 424 pp, 1973.

749 Ross, H. B. and Granat, L.: Deposition of atmospheric trace metals in northern Sweden as measured in the  
750 snowpack, *Tellus*, 38B, 27–43, 1986.

751 Rossini Oliva, S. and Fernández Espinosa, A. J.: Monitoring of heavy metals in topsoils, atmospheric particles and  
752 plant leaves to identify possible contamination sources, *Microchem. J.*, 86, 131–139, 2007.

753 Rudnick, R. L. and Gao, S.: Composition of the continental crust. *Treatise on Geochemistry*, Ed. H. D. Holland, K.  
754 K. Turekian. Elsevier V. 3, 1–63, 2003.

755 Santelman, M. V. and Gorham, E.: The influence of airborne road dust on the chemistry of Sphagnum mosses, *J.*  
756 *Ecol.*, 76, 1219-1231, 1988.

757 Shevchenko, V.: The influence of aerosols on the oceanic sedimentation and environmental conditions in the Arctic,  
758 *Berichte zur Polar- und Meeresforschung*, 464, 149 pp, 2003.

759 Shevchenko, V., Lisitzin A., Vinogradova, A. and Stein R.: Heavy metals in aerosols over the seas of the Russian  
760 Arctic, *Sci. Total Environ.*, 306 (1–3), 11–25, doi: 10.1016/S0048-9697(02)00481-3, 2003.

761 Shevchenko, V. P., Korobov, V. B., Lisitzin, A. P., Aleshinskaya, A. S., Bogdanova, O. Yu., Goryunova, N. V.,  
762 Grishchenko, I. V., Dara, O. M., Zavernina, N. N., Kurteeva, E. I., Novichkova, E. A., Pokrovsky, O. S., and Sapozhnikov,  
763 F. V.: First data on the composition of atmospheric dust responsible for yellow snow in northern European Russia in March  
764 2008, *Doklady Earth Sciences*, 431 (2), 497–501, doi: 10.1134/S1028334X10040185, 2010.

765 Shevchenko, V. P., Lisitsyn, A. P., Polyakova, E. I., Dethleff, D., Serova, V. V., and Stein, R.: Distribution and  
766 composition of sedimentary material in the snow cover of arctic drift ice (Fram Strait), *Doklady Earth Sci.*, 383A, 278–  
767 281, 2002.

768 Shevchenko, V. P., Lisitzin, A. P., Vinogradova, A. A., Smirnov, V. V., Serova, V. V., and Stein, R.: Arctic  
769 aerosols. Results of ten-year investigations, *Atmos. Oceanic Optics*, 13, 510–533, 2000.

770 Shevchenko, V. P., Vorob'ev, S. N., Kirpotin, S. N., Kritskov, I. V., Manasyrov, R. M., Pokrovsky, O. S., and Politova,  
771 N. V.: Investigations of insoluble particles in the snow cover of Western Siberia from Tomsk to the Ob estuary, *Optika*  
772 *Atmosfery i Okeana*, 28(6), 499–504, doi: 10.15372/AOO20150601, 2015. (in Russian).

773 Shevchenko, V. P., Vinogradova, A. A., Lisitzin, A. P., Novigatsky, A. N., Panchenko, M. V., and Pol'kin, V. V.:  
774 Aeolian and ice transport of matter (including pollutants) in the Arctic. In: Kallenborn, R. (Ed.), *Implications and Consequences*  
775 *of Anthropogenic Pollution in Polar environments, From Pole to Pole*. Springer-Verlag, Berlin Heidelberg, pp. 59–73, doi:  
776 10.1007/978-3-642-12315-3\_5, 2016.

777 Schot, P. P., van der Wal, J.: Human impact on regional groundwater composition through intervention in natural  
778 flow patterns and changes in land use, *J. Hydrol.*, 134, 297–313, 1992.

779 Shoty, W., Nesbitt, H. W., and Fyfe, W. S.: The behaviour of major and trace elements in complete vertical peat  
780 profiles from three Sphagnum bogs, *Internat. J. Coal Geol.*, 15, 163–190, 1990.

781 Shoty, W., Nesbitt, H. W., and Fyfe, W. S.: Natural and anthropogenic enrichments of trace metals in peat profiles,  
782 *Internat. J. Coal Geol.*, 20(1-2), 49–84, 1992.

783 Singh, V. P., Singh, P., and Haritashya, U. K.: *Encyclopedia of Earth Sciences Series: Encyclopedia of Snow, Ice*  
784 *and Glaciers*, Springer, 1253 pp, 2011.

785 Siudek, P., Frankowski, M., and Siepak, J.: Trace element distribution in the snow cover from an urban area in  
786 central Poland, *Environ. Monit. Assess.* 187, 225, 2015.

787 Smith, L. C., Macdonald, G. M., Velichko, A. A., Beilman, D. W., Borisova, O. K., Frey, K. E., Kremenetsky, K.  
788 V., and Sheng, Y.: Siberian peatlands as a net carbon sink and global methane source since the early Holocene, *Science*,  
789 303, 353–356, 2004.

790 Snyder-Conn, E., Garbarino, J. R., Hoffman, G. L., and Oelkers, A.: Soluble trace elements and total mercury in  
791 Arctic Alaskan snow, *Arctic* 50(3), 201–215, 1997.

792 Steinnes, E. and Friedland, A. J.: Metal contamination of natural surface soils from long-range atmospheric  
793 transport: Existing and missing knowledge, *Environ. Rev.* 14, 169–186, 2006.

794 Stepanova, V. M., Pokrovsky, O. S., Viers, J., Mironycheva-Tokareva, N. P. Kosykh, N. P., and Vishnyakova, E.  
795 K.: Major and trace elements in peat profiles in Western Siberia: impact of the landscape context, latitude and permafrost  
796 coverage, *Appl. Geochem.*, 53, 53–70, 2015.

797 Stohl, A., Klimont, Z., Eckhardt, S., Kupiainen, K., Shevchenko, V. P., Kopeikin, V. M., and Novigatsky, A. N.:  
798 Black carbon in the Arctic: the underestimated role of gas flaring and residential combustion emissions, *Atmos. Chem.*  
799 *Phys.*, 13, 8833–8855, doi:10.5194/acp-13-8833-2013, 2013.

800 Sutherland, R. A., Tolosa, C. A., Tack, F. M., and Verloo, M. G.: Characterization of selected element concentration  
801 and enrichment ratios in background and anthropogenically impacted roadside areas, *Arch. Environ. Contam. Toxicol.*, 38  
802 (4), 428–438, 2000.

803 Talovskaya, A. V., Simonenkov, D. V., Filimonenko, E. A., Belan, B. D., Yazikov, E. G., Rychkova, D. A., and  
804 Il'enok, S. S.: Study of aerosol composition in Tomsk region background and urban stations (the winter period 2012/13),  
805 *Optika Atmosfery i Okeana*, 27, 999–1005, 2014.

806 Telmer, K., Bonham-Karter, G. F., Kliza, D. A., and Hall, G. E. M.: The atmospheric transport and deposition of  
807 smelter emissions: Evidence from the multi-element geochemistry of snow, Quebec, Canada, *Geochim. Cosmochim. Acta*,  
808 68, 2961–2980, 2004.

809 Thioulouse, J., Chessel, D., Doledec, S., and Olivier, J. M.: ADE-4: a multivariate analysis and graphical display  
810 software, *Statistics and Computing*, 7, 75–83, doi:10.1023/A:1018513530268, 1997.

811 Tranter, M., Brimblecombe, P., Davies, T. D., Vincent, C. E., Abrahams, P. W., and Blackwood I.: The chemical  
812 composition of snowpack, snowfall and meltwater in the Scottish Highlands Highlands - evidence for preferential elution,  
813 *Atmos. Environ.*, 20, 517–525, 1986.

814 Tranter, M., Davies, T.D., Abrahams, P. W., Blackwood, I., Brimblecombe, P., and Vincent, C. E.: Spatial  
815 variability in the chemical composition of snowcover in a small, remote Scottish catchment, *Atmos. Environ.*, 21, 853–862,  
816 1987.

817 Tyrtikov, A. P.: Thawing of soils in tundra of western Siberia, In: *Natural environment of western Siberia*. Popov,  
818 A. I. (ed.) *Izd-vo MGU, Moscow*, 1973 (in Russian)

819 Tyrtikov, A. P.: Dynamics of vegetation coverage and permafrost development in western Siberia, *Nauka, Moscow*,  
820 1979 (in Russian).

821 Van de Velde, K., Ferrari, C., Barbante, C., Moret, I., Bellomi, T., Hong, S., and Boutron, C.: A 200 year record of  
822 atmospheric cobalt, chromium, molybdenum, and antimony in high altitude alpine firn and ice, *Environ. Sci. Technol.*, 33,  
823 3495–3501, 1999.

824 Vasil'chuk, Yu. K., Shevchenko, V. P., Lisitzin, A. P., Budantseva, N. A., Vorobiov, S. N., Kirpotin, S. N., Krizkov,  
825 I. V., Manasyrov, R. M., Pokrovsky, O. S., Chizhova, Ju. N.: Oxygen isotope and deuterium composition of snow cover on  
826 the profile of West Siberia from Tomsk to the Ob Bay, *Doklady Earth Sciences*, 471(12), 1284-1287.

827 Vasil'evskaya, V. D., Ivanov, V. V., and Bogatyrev, L. G.: Soils of North of western Siberia, Moscow University  
828 Publ. House, Moscow, 228 pp, 1986 (in Russian).

829 Vinogradova, A. A., Malkov, I. P., Polissar, A. V., Khramov, N. N.: Elemental composition of the surface  
830 atmospheric aerosol in the Arctic regions of Russia, *Izvestiya, Atmospheric and Oceanic Physics* 29, 149–157, 1993.

831 Walker, T. R., Young, S. D., Crittenden, P. D., and Zhang, H.: Anthropogenic metal enrichment of snow and soil in  
832 north-eastern European Russia, *Environ. Pollut.*, 121, 11–21, 2003.

833 Weinbruch, S., Wiesemann, D., Ebert, M., Schütze, K., Kallenborn, R., and Ström, J.: Chemical composition and  
834 sources of aerosol particles at Zeppelin Mountain (Ny Ålesund, Svalbard): An electron microscopy study, *Atmos. Environ.*,  
835 49, 142–150, 2012.

836 Welch, H. E., Muir, D. C. G., Billeck, B. N., Lockhart, W. L., Brunskill, G. J., Kling, H. J., Olson, M. P., and  
837 Lemoine, R. M.: Brown snow: a long-range transport event in the Canadian Arctic, *Environ. Sci. Technol.*, 25, 280–286,  
838 1991.

839 Yashchenko, I. G., Svarovskaya, L. I., and Alexeeva, M. N.: Assessment of environmental risk associated with gas  
840 flaring in Western Siberia, *Optika Atmosfery i Okeana*, 27(6), 560–564, 2014 (in Russian).

841 Yeghicheyan, D., Bossy, C., Bouhnik Le Coz, M., Douchet, Ch., Granier, G., Heimbürger, A., Lacan, F.,  
842 Lanzanova, A., Rousseau, T. C. C., Seidel, J.-L., Tharaud, M., Candaudap, F., Chmeleff, J., Cloquet, C., Delpoux, S.,  
843 Labatut, M., Losno, R., Pradoux, C., Sivry, Y., and Sonke, J. E.: A Compilation of Silicon, Rare Earth Element and  
844 Twenty-One other Trace Element Concentrations in the Natural River Water Reference Material SLRS-5 (NRC-CNRC),  
845 *Geostand. Geoanal. Res.*, 37, 449–467, doi:10.1111/j.1751-908X.2013.00232.x, 2013.

846 Zakharova, E. A., Kouraev, A. V., Biancamaria, S., Kolmakova, M. V., Mognard, N. M., Zemtsov, V. A., Kirpotin,  
847 S. N., and Decharme, B.: Snow cover and spring flood flow in the northern part of Western Siberia (the Poluy, Nady,  
848 Pur, and Taz Rivers), *J. Hydrometeorol.*, 12, 1498-1511, 2011.

849 Zdanowicz, C., Hall, G., Vaive, J., Amelin, Y., Percival, J., Girard, I., Biscaye, P., and Bory, A.: Asian dustfall in  
850 the St. Elias Mountains, Yukon, Canada, *Geochim. Cosmochim. Acta*, 70, 3493–3507, 2006.

851 Zdanowicz, C. M., Zielinski, G. A., and Wake, C. P.: Characteristics of modern atmospheric dust deposition in snow  
852 on the Penny Ice Cap, Baffin Island, Arctic Canada, *Tellus*, 50B, 506–520, 1998.

853 Zhang, Y., Mahowald, N., Scanza, R.A., Journet, E., Desboeufs, K., Albani, S., Kok, J.F., Zhuang, G., Chen, Y.,  
854 Cohen, D. D., Paytan, A., Patey, M. D., Achterberg, E. P., Engelbrecht, J. P., and Fomba, K. W.: Modeling the global  
855 emission, transport and deposition of trace elements associated with mineral dust, *Biogeosciences* 12, 5771–5792, 2015.

856

857

858

859

860

861

862

863

864

865

866

867

868

869

870

871

872

873

874

875

876 **Table 1.** Minimal, maximal, median and geometric mean concentration of dissolved ( $\mu\text{g L}^{-1}$  snow water), n=35, and particulate  
877 ( $\mu\text{g g}^{-1}$  particles), n=34 snow components. The data for upper continental crust (UPC) are from Rudnick and Gao (2003). N.A.  
878 stands for non analyzed.

| Element                                     | Dissolved |        |        |                | Particulate |        |        |                | UPC   |
|---------------------------------------------|-----------|--------|--------|----------------|-------------|--------|--------|----------------|-------|
|                                             | Min       | Max    | Median | Geometric mean | Min         | Max    | Median | Geometric mean |       |
| <b>pH</b>                                   | 4.38      | 8.73   | 5.11   | 5.44           | N.A.        | N.A.   | N.A.   | N.A.           | N.A.  |
| <b>SC, <math>\mu\text{S cm}^{-1}</math></b> | 9         | 35     | 15.5   | 16.3           | N.A.        | N.A.   | N.A.   | N.A.           | N.A.  |
| <b>DIC, mg/L</b>                            | 0.26      | 2.12   | 0.37   | 0.47           | N.A.        | N.A.   | N.A.   | N.A.           | N.A.  |
| <b>DOC, mg/L</b>                            | 0.46      | 1.87   | 0.84   | 0.85           | N.A.        | N.A.   | N.A.   | N.A.           | N.A.  |
| <b>Cl, mg/L</b>                             | 0.07      | 2.94   | 0.51   | 0.48           | N.A.        | N.A.   | N.A.   | N.A.           | N.A.  |
| <b>SO<sub>4</sub>, mg/L</b>                 | 0.41      | 2.01   | 0.71   | 0.72           | N.A.        | N.A.   | N.A.   | N.A.           | N.A.  |
| <b>Li</b>                                   | N.A.      | N.A.   | N.A.   | N.A.           | 2.6         | 32.2   | 10.8   | 10.7           | 24    |
| <b>Be</b>                                   | N.A.      | N.A.   | N.A.   | N.A.           | 0.12        | 2.11   | 0.59   | 0.59           | 2.1   |
| <b>Na</b>                                   | 47        | 1982   | 295    | 303            | 1452        | 39156  | 6717   | 7314           | 24200 |
| <b>Mg</b>                                   | 19        | 862    | 114    | 114            | 3492        | 156712 | 19089  | 21411          | 14900 |
| <b>Al</b>                                   | 1.6       | 35.2   | 15.5   | 12.3           | 6444        | 138267 | 31079  | 31565          | 81500 |
| <b>P</b>                                    | N.A.      | N.A.   | N.A.   | N.A.           | 70          | 1928   | 481    | 503            | 660   |
| <b>Si</b>                                   | 3.5       | 180    | 64.6   | 33.2           | N.A.        | N.A.   | N.A.   | N.A.           | N.A.  |
| <b>K</b>                                    | 39.2      | 120    | 55.5   | 63.0           | 1682        | 38395  | 5895   | 6023           | 23200 |
| <b>Ca</b>                                   | 57        | 2266   | 267    | 296            | 3944        | 159272 | 17331  | 17775          | 25600 |
| <b>Ti</b>                                   | 0.001     | 0.338  | 0.032  | 0.018          | 194         | 5762   | 674    | 689            | 3800  |
| <b>V</b>                                    | 0.007     | 0.221  | 0.051  | 0.049          | 23.8        | 322    | 67.4   | 69.7           | 97    |
| <b>Cr</b>                                   | 0.027     | 0.340  | 0.111  | 0.117          | 43.8        | 841    | 138    | 156            | 92    |
| <b>Mn</b>                                   | 0.62      | 9.54   | 3.06   | 2.99           | 180         | 1242   | 400    | 404            | 780   |
| <b>Fe</b>                                   | 1.8       | 62.2   | 14.6   | 12.0           | 7206        | 41255  | 15873  | 16488          | 39100 |
| <b>Co</b>                                   | 0.006     | 0.418  | 0.097  | 0.094          | 5.9         | 60.7   | 19.4   | 18.6           | 17.3  |
| <b>Ni</b>                                   | 0.04      | 5.66   | 0.36   | 0.36           | 28.1        | 1067   | 149    | 145            | 47    |
| <b>Cu</b>                                   | 0.16      | 2.51   | 0.57   | 0.63           | 13.1        | 273    | 63.4   | 75.1           | 28    |
| <b>Zn</b>                                   | 1.7       | 31.0   | 8.3    | 8.3            | 70.7        | 3832   | 202    | 255            | 67    |
| <b>Ga</b>                                   | 0.0001    | 0.0185 | 0.0023 | 0.0014         | 1.8         | 26.7   | 8.32   | 7.73           | 17.5  |
| <b>Ge</b>                                   | N.A.      | N.A.   | N.A.   | N.A.           | 0.36        | 3.18   | 0.88   | 0.91           | 1.4   |
| <b>As</b>                                   | 0.02      | 0.46   | 0.19   | 0.15           | 3.8         | 67.2   | 16.1   | 16.0           | 4.8   |
| <b>Rb</b>                                   | 0.033     | 0.262  | 0.066  | 0.075          | 6.1         | 124    | 24.1   | 23.4           | 84    |
| <b>Sr</b>                                   | 0.26      | 10.2   | 1.04   | 1.23           | 26.2        | 580    | 117    | 115            | 320   |
| <b>Y</b>                                    | N.A.      | N.A.   | N.A.   | N.A.           | 1.52        | 40.2   | 7.1    | 7.5            | 21    |
| <b>Zr</b>                                   | 0.0001    | 0.0403 | 0.0024 | 0.0015         | 7.7         | 383    | 36.8   | 38.5           | 193   |
| <b>Nb</b>                                   | N.A.      | N.A.   | N.A.   | N.A.           | 0.80        | 25.5   | 3.54   | 3.72           | 12    |
| <b>Mo</b>                                   | 0.0001    | 0.059  | 0.010  | 0.005          | 0.55        | 10.4   | 2.12   | 2.24           | 1.1   |
| <b>Cd</b>                                   | 0.015     | 0.180  | 0.047  | 0.046          | 0.11        | 3.37   | 0.71   | 0.71           | 0.09  |

|           |         |         |         |         |       |      |      |      |      |
|-----------|---------|---------|---------|---------|-------|------|------|------|------|
| <b>Sn</b> | N.D.    | N.D.    | N.D.    | N.D.    | 1.13  | 29.3 | 7.76 | 7.36 | 2.1  |
| <b>Sb</b> | 0.009   | 0.132   | 0.036   | 0.038   | 1.67  | 27.2 | 5.96 | 6.15 | 0.4  |
| <b>Cs</b> | 0.0015  | 0.0105  | 0.0034  | 0.0036  | 0.32  | 4.78 | 1.35 | 1.24 | 4.9  |
| <b>Ba</b> | 0.74    | 13.6    | 3.35    | 3.32    | 88    | 1664 | 374  | 391  | 628  |
| <b>La</b> | 0.001   | 0.049   | 0.012   | 0.011   | 2.0   | 60.2 | 10.3 | 10.8 | 31   |
| <b>Ce</b> | 0.003   | 0.095   | 0.022   | 0.019   | 4.05  | 128  | 19.0 | 20.6 | 63   |
| <b>Pr</b> | 0.0001  | 0.0084  | 0.0022  | 0.0019  | 0.50  | 15.5 | 2.30 | 2.35 | 7.1  |
| <b>Nd</b> | 0.0013  | 0.0275  | 0.0085  | 0.0067  | 1.86  | 58.6 | 8.32 | 8.70 | 27   |
| <b>Sm</b> | 0.0001  | 0.0072  | 0.0020  | 0.0016  | 0.39  | 11.8 | 1.78 | 1.79 | 4.7  |
| <b>Eu</b> | 0.00010 | 0.00253 | 0.00096 | 0.00083 | 0.11  | 2.56 | 0.45 | 0.47 | 1.0  |
| <b>Gd</b> | 0.0004  | 0.0082  | 0.0022  | 0.0022  | 0.40  | 10.3 | 1.71 | 1.77 | 4.0  |
| <b>Dy</b> | 0.00002 | 0.0041  | 0.0016  | 0.0008  | 0.32  | 7.83 | 1.35 | 1.42 | 3.9  |
| <b>Ho</b> | 0.00006 | 0.00123 | 0.00061 | 0.00054 | 0.06  | 1.51 | 0.26 | 0.27 | 0.83 |
| <b>Er</b> | 0.0002  | 0.0029  | 0.0010  | 0.0010  | 0.18  | 4.71 | 0.77 | 0.80 | 2.3  |
| <b>Tm</b> | 0.00002 | 0.00088 | 0.00011 | 0.00009 | 0.03  | 0.72 | 0.11 | 0.11 | 0.3  |
| <b>Yb</b> | 0.00000 | 0.00289 | 0.00089 | 0.00049 | 0.16  | 4.91 | 0.73 | 0.73 | 1.96 |
| <b>Lu</b> | N.A.    | N.A.    | N.A.    | N.A.    | 0.024 | 0.76 | 0.11 | 0.11 | 0.31 |
| <b>Hf</b> | N.A.    | N.A.    | N.A.    | N.A.    | 0.25  | 13.2 | 1.10 | 1.18 | 5.3  |
| <b>Ta</b> | N.A.    | N.A.    | N.A.    | N.A.    | 0.18  | 4.35 | 0.62 | 0.62 | 0.9  |
| <b>W</b>  | 0.002   | 0.108   | 0.020   | 0.017   | 2.0   | 102  | 35.9 | 28.8 | 1.9  |
| <b>Tl</b> | N.A.    | N.A.    | N.A.    | N.A.    | 0.04  | 0.73 | 0.23 | 0.23 | 0.90 |
| <b>Pb</b> | 0.02    | 3.67    | 0.51    | 0.38    | 13.2  | 703  | 71.9 | 67.9 | 17   |
| <b>Th</b> | N.A.    | N.A.    | N.A.    | N.A.    | 0.43  | 17.1 | 2.22 | 2.33 | 10.5 |
| <b>U</b>  | 0.0007  | 0.0063  | 0.0031  | 0.0028  | 0.19  | 4.69 | 0.92 | 0.93 | 2.7  |

879

880

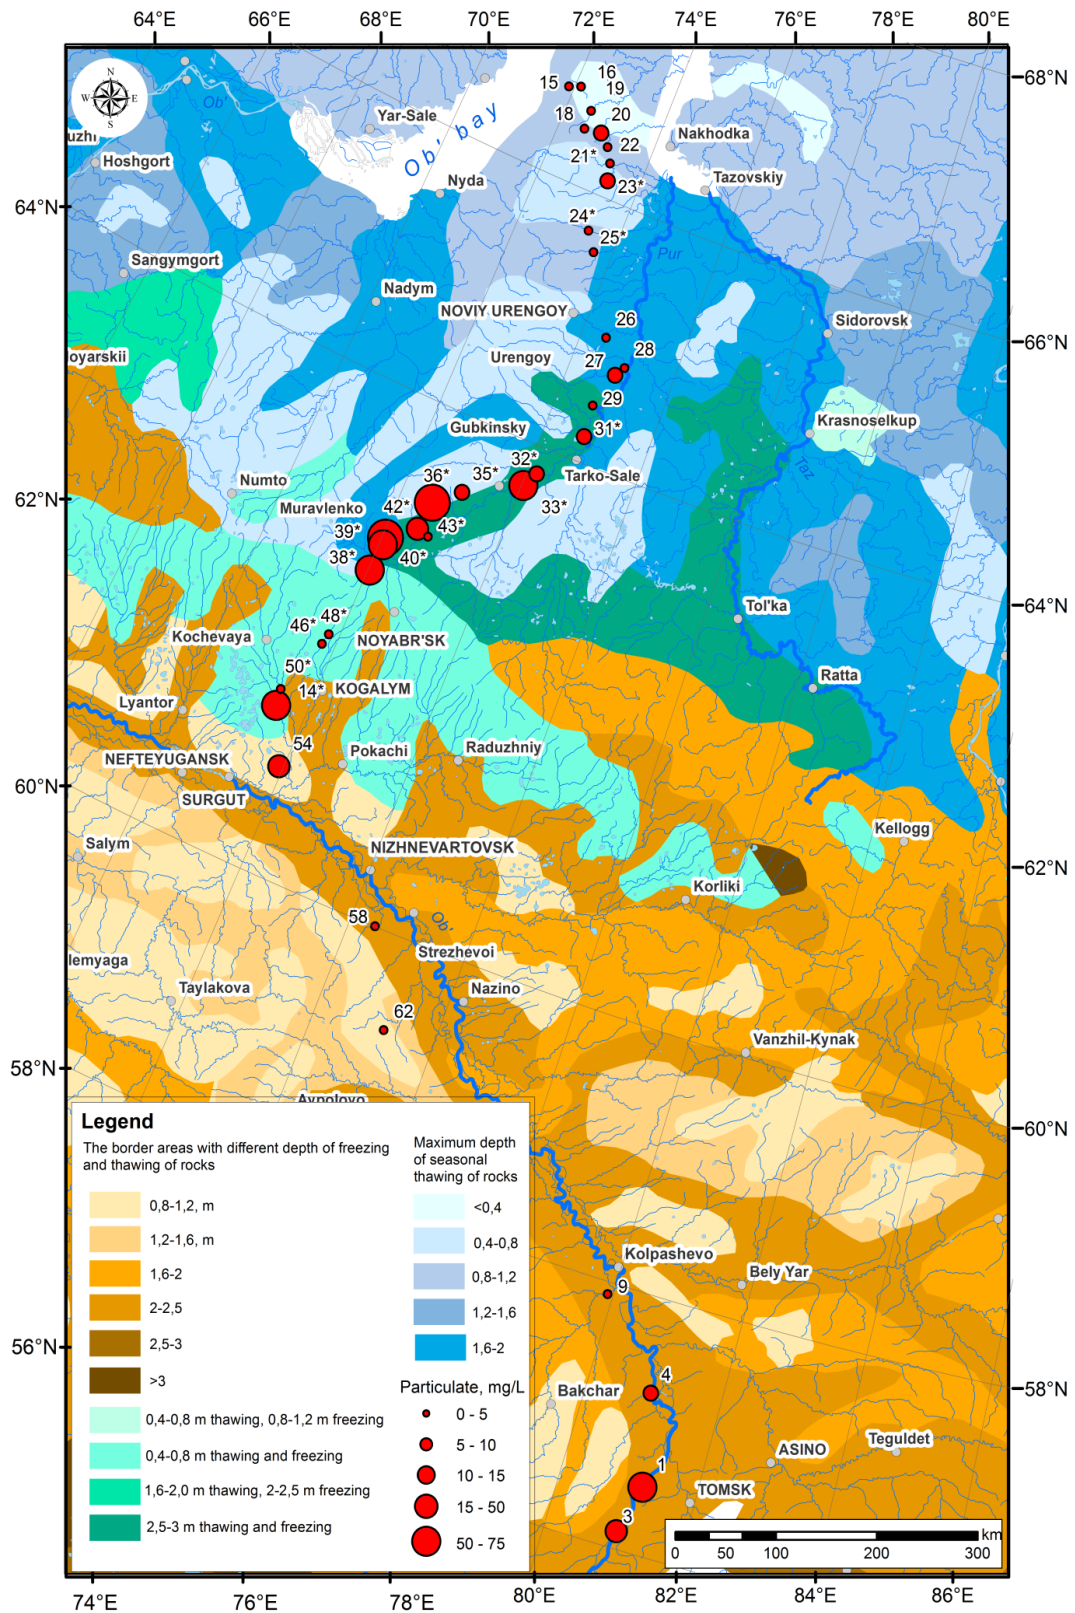

881

882

883 **Figure 1.** Map of the study site. The size of the sampling points reflects the concentration of particulate fraction

884 ( $\text{mg/L}_{\text{snow water}}$ )

885

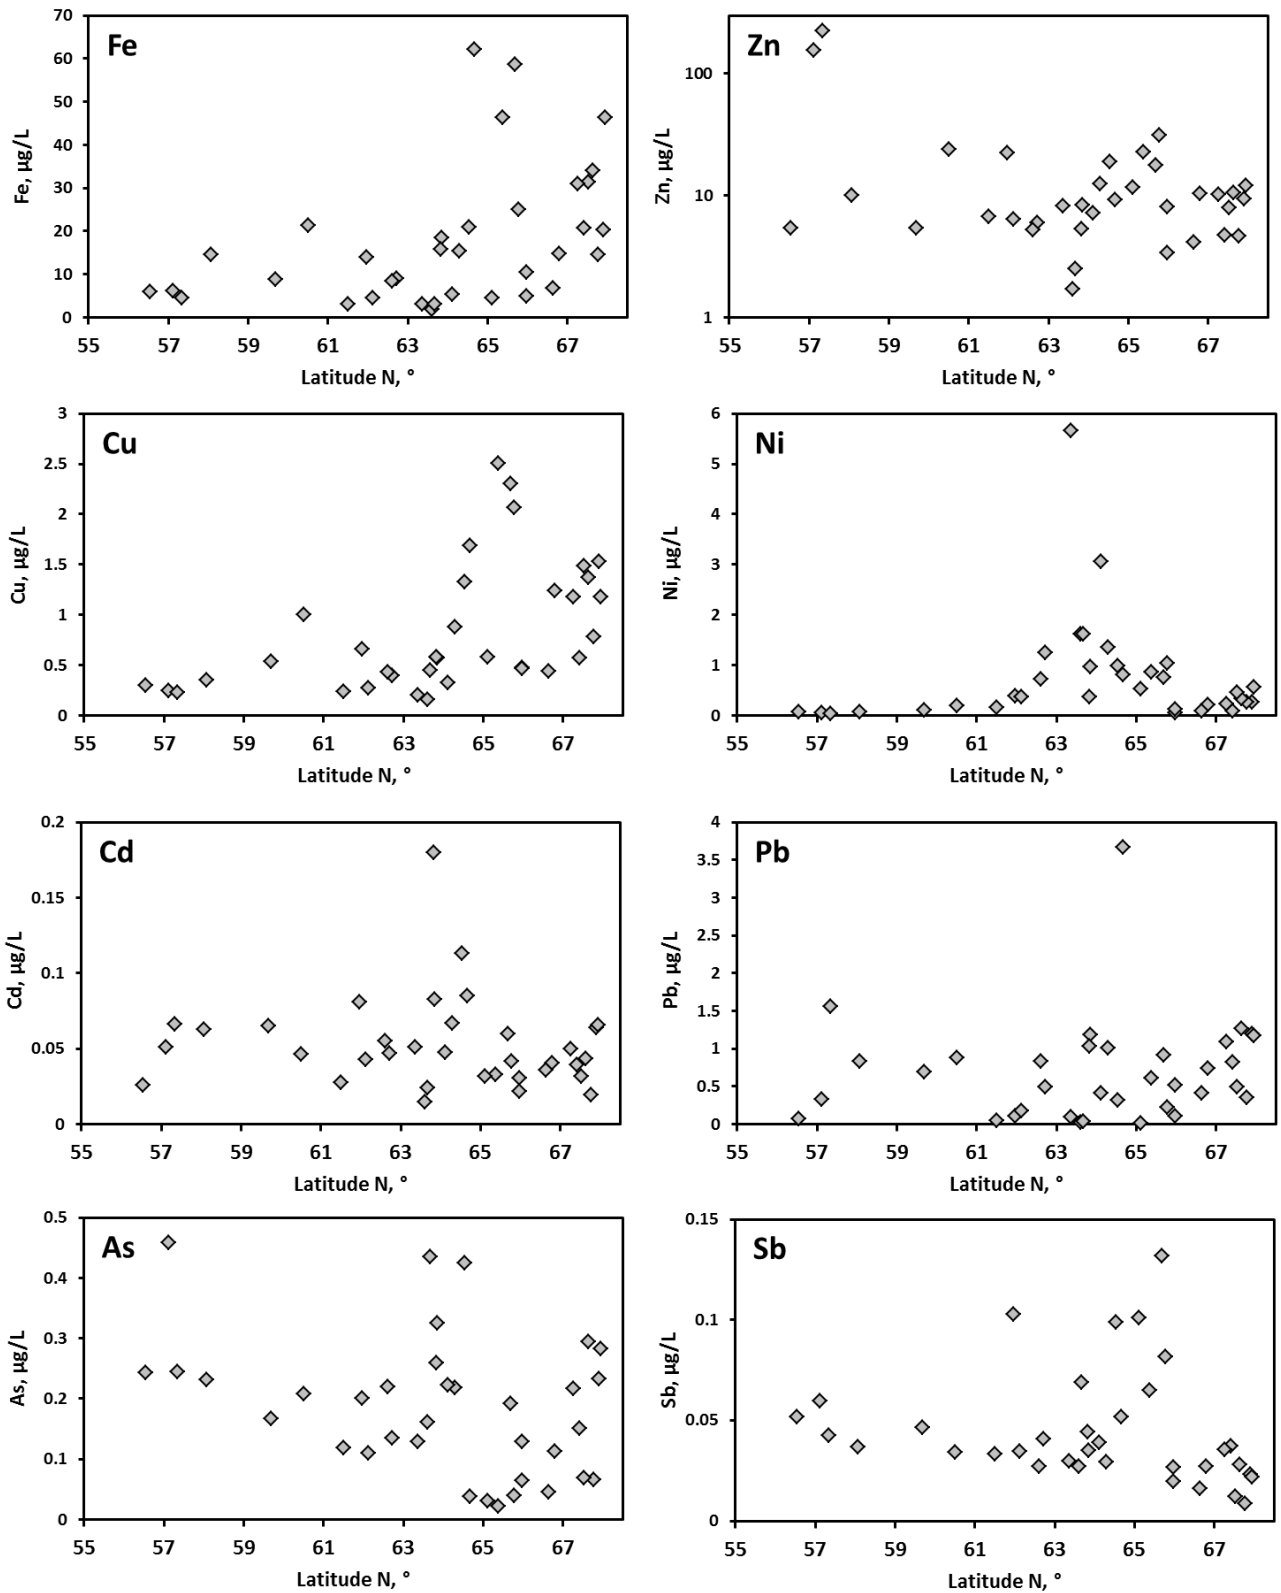

886

887

888

889 **Fig. 2.** Examples of dissolved ( $< 0.45 \mu\text{m}$ ) metal concentrations in snow water as a function of latitude. **The cause for**

890 **the elevated concentrations of Ni, Cd and Sb at ca. 64-65°N is most likely industrial impact, but given relatively low**

891 **number of data points around industrial centers it is hard to prove it unambiguously.**

892

893  
894  
895  
896  
897  
898  
899  
900  
901  
902  
903  
904  
905  
906

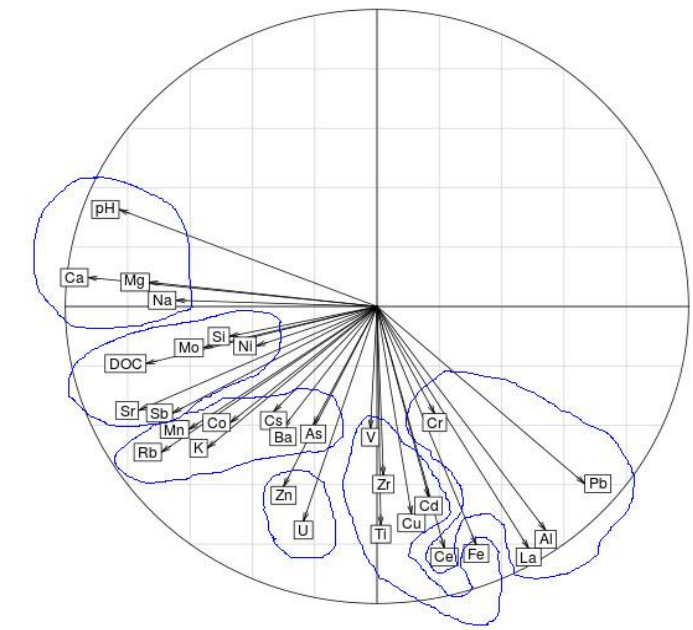

dissolved fraction

**A**

### Cluster Dendrogram

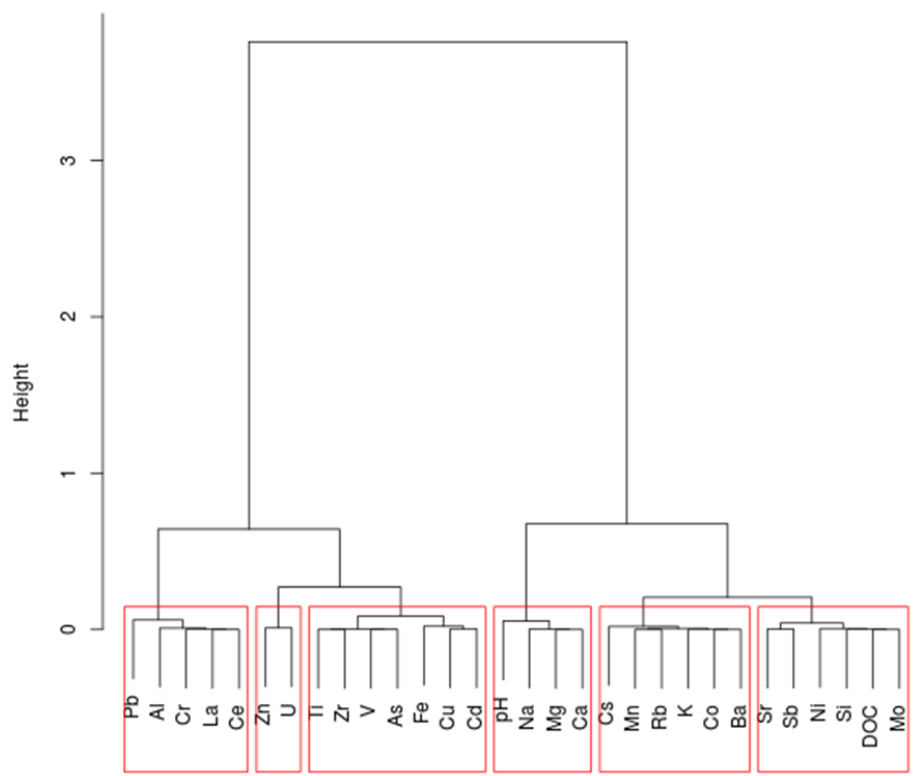

dissolved fraction

**B**

907  
908  
909  
910  
911  
912

**Fig. 3 A:** PCA Factorial map F1x2 of elements of a reconstructed table for the dissolved fraction. Partition of elements into 6 groups revealed by HCA is shown by a contour line. **B:** Dendrogram of a hierarchical cluster analysis (HCA) performed on variables of a reconstructed table for the dissolved fraction using the Pearson correlation as a distance measure and Ward's method for the linkage rule.



913

914

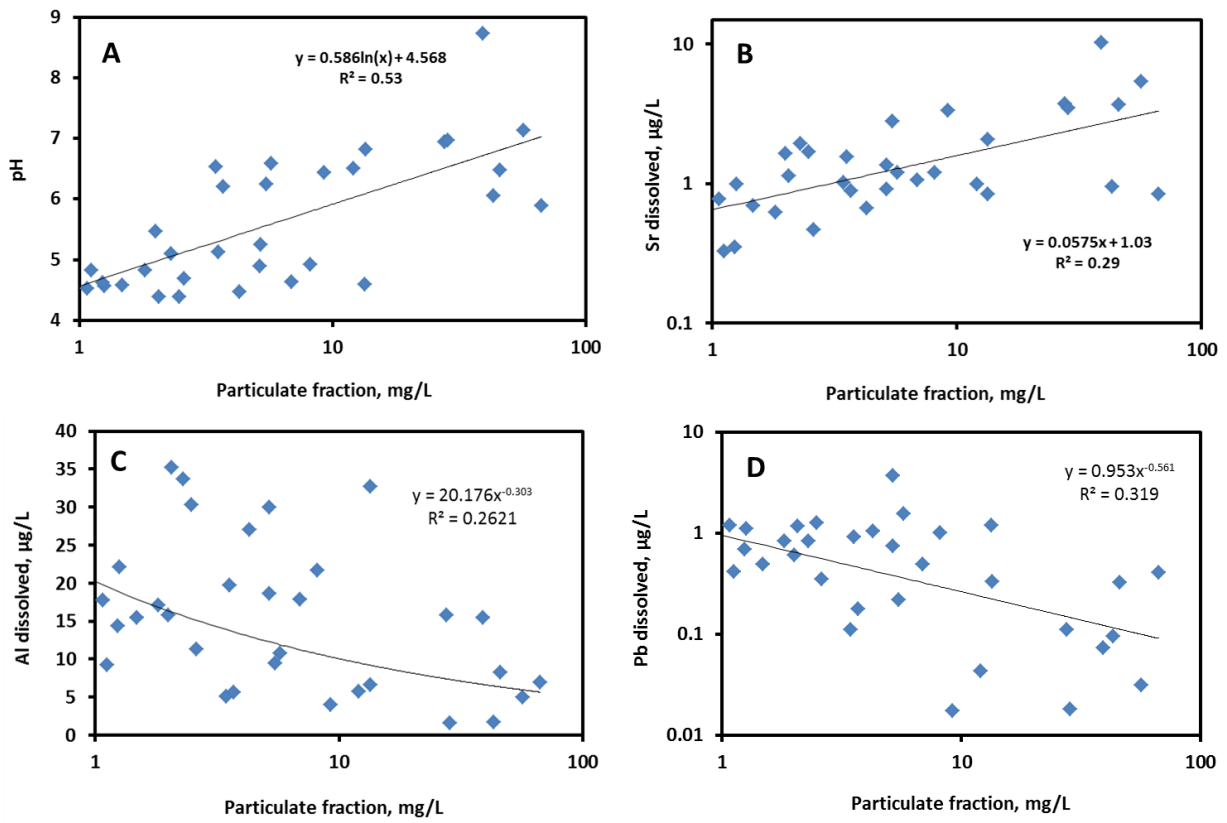

915

916

917

918

919 **Fig. 4.** pH value (A) and Sr (B), Al (C) and Pb (D) concentration in dissolved fraction of snow as a function of  
920 concentration of particles. Note log X scale for Sr and Pb.

921

922

923

924

925

926

927

928

929

930

931

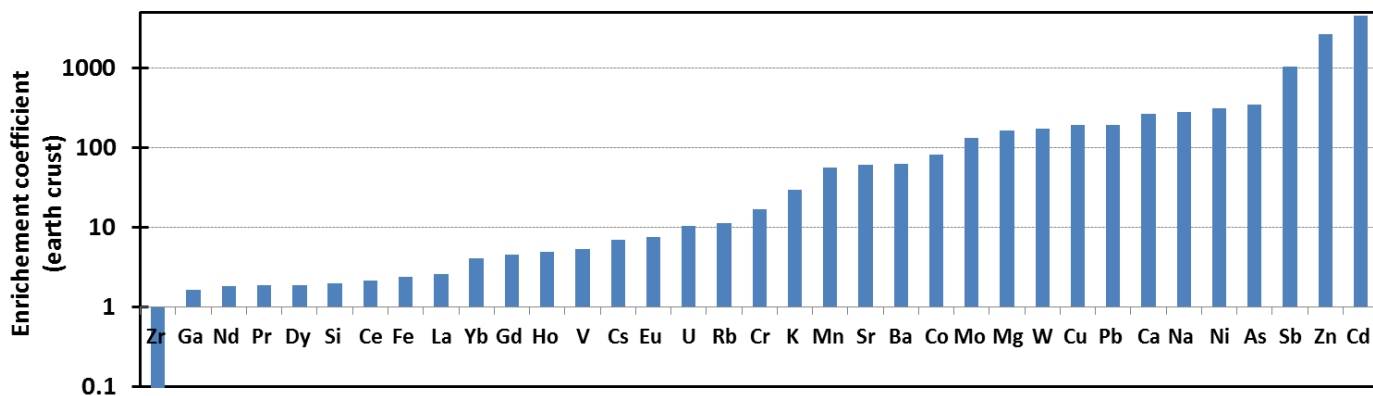

5 **Fig. 5 A.** The latitude-averaged Al-normalized enrichment coefficient of snow particles with respect to the earth crust.

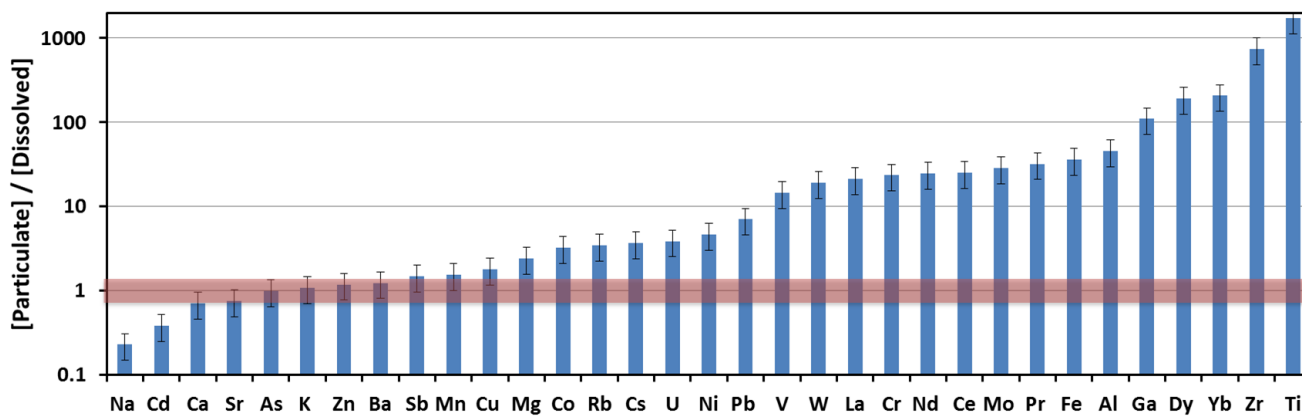

10 **Fig. 5 B.** The average values (56 to 68°N) of the ratio of particulate to dissolved element concentration in snow water of western Siberia. Bold red line indicates statistically non-significant deviation from 1.

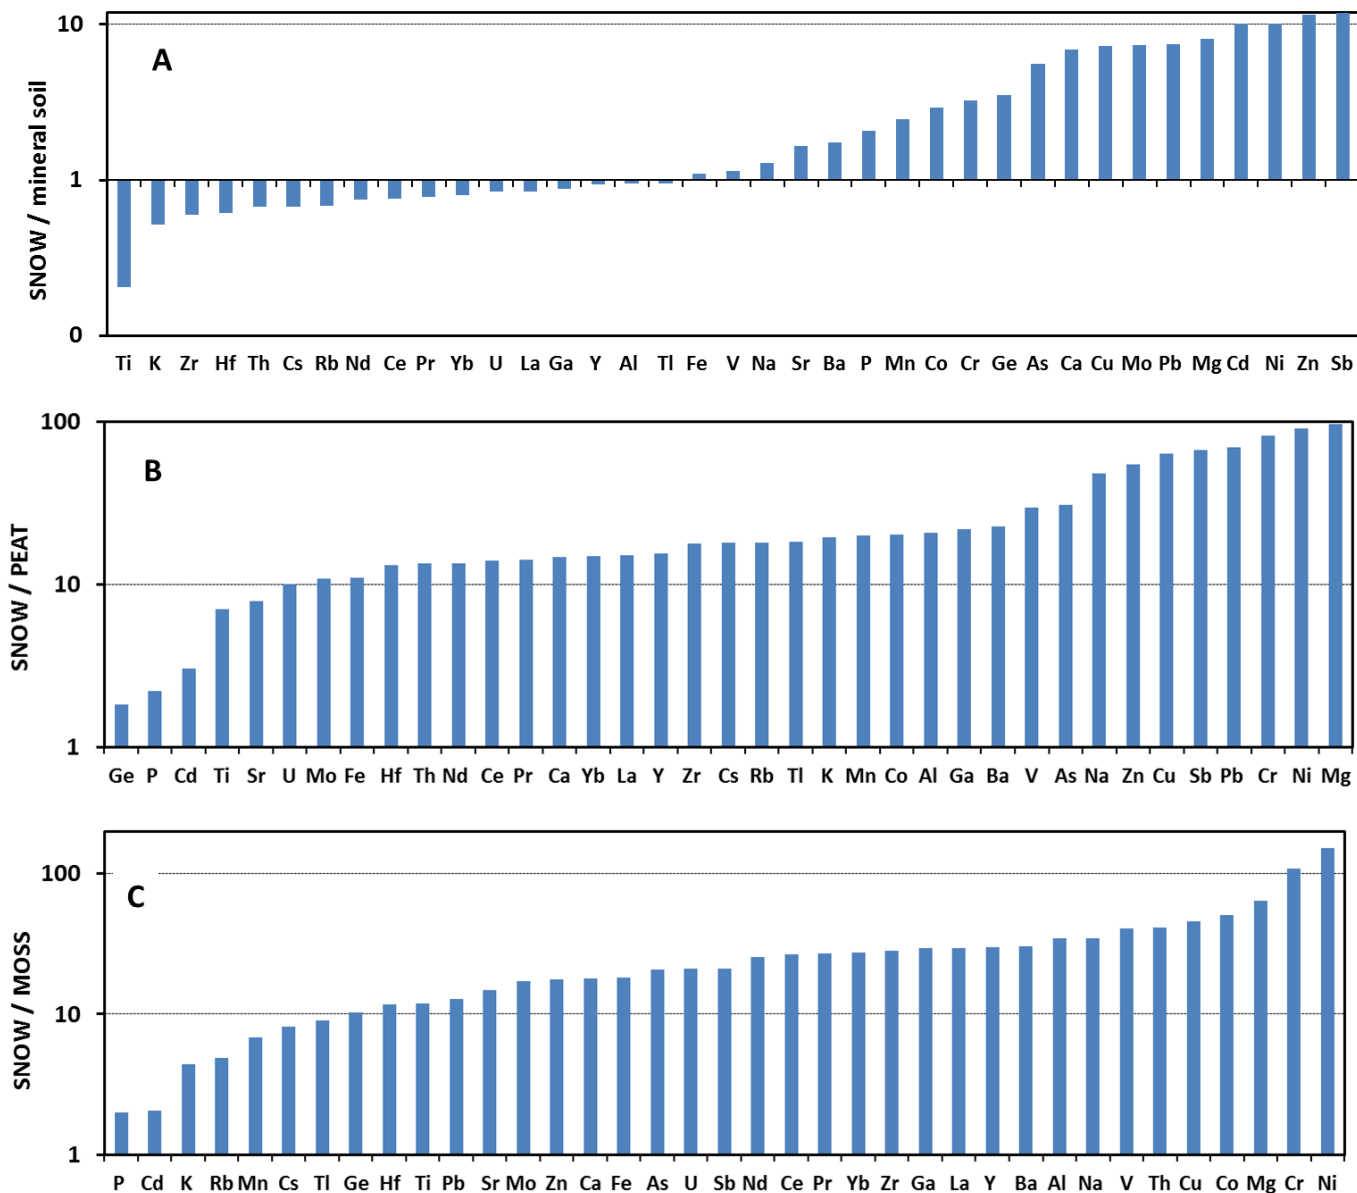

**Fig. 6.** The ratios of the average concentrations of elements in snow particles (neglecting sample SF22) to those in mineral soil (A), peat (B) and mosses (C) of WSL. The peat, moss, and underlying mineral horizons data are averaged over the latitude of 55 to 68°N as described in Stepanova et al (2015). Note normal Y scale for mineral soil (A) and log Y scale for peat and moss (B, C).

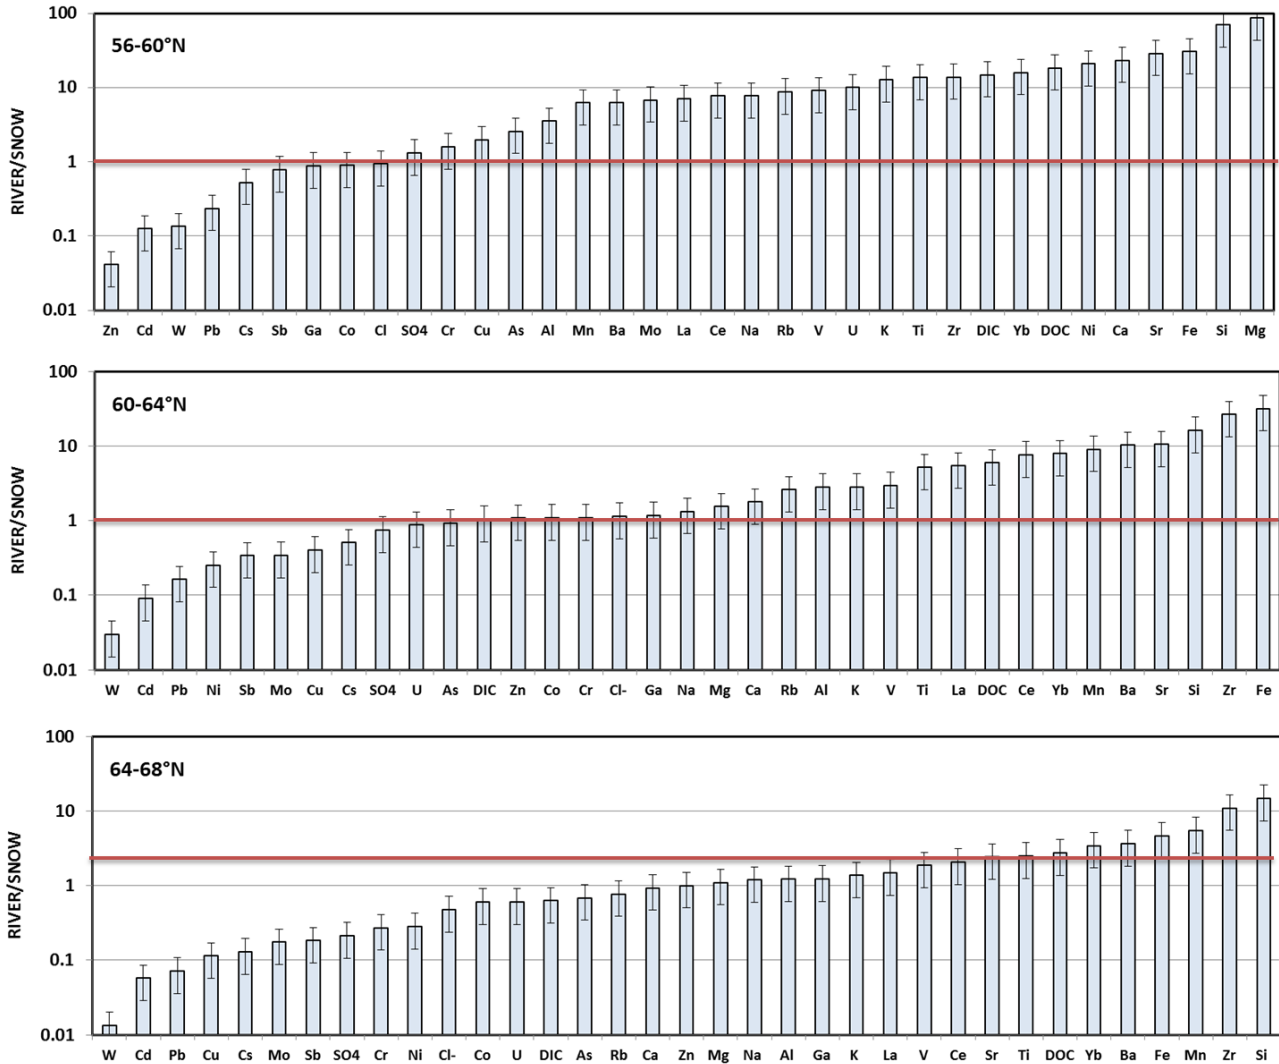

5 **Fig. 7.** The ratio of mean dissolved flux of rivers in three latitudinal zones (56-60°N, 60-64°N, and 64-68°N) of WSL to the stock of dissolved fraction of snow. For this calculation, the snow volume (in mm of water) accumulated over full winter and mean river runoff over May and June were used.

## SUPPLEMENTARY INFORMATION

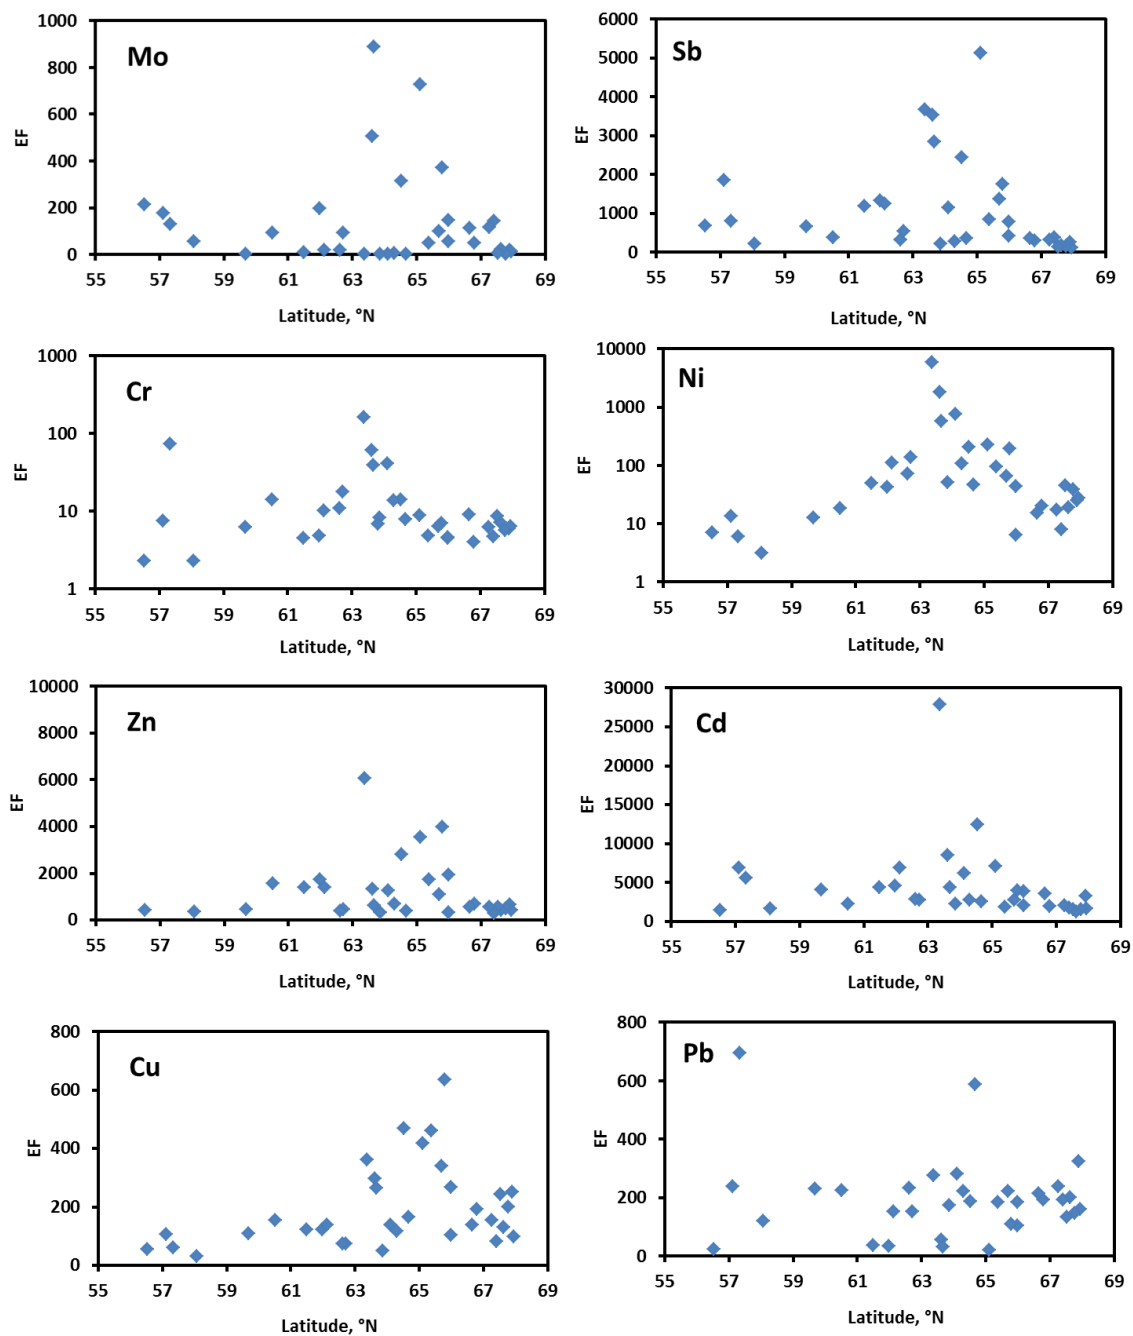

**Fig. S1.** The Al-based enrichment factor (relative to the upper part of continental earth crust) of particulate fraction of snow for Mo, Sb, Cr, Ni, Zn, Cd, Cu and Pb as a function of latitude.

5

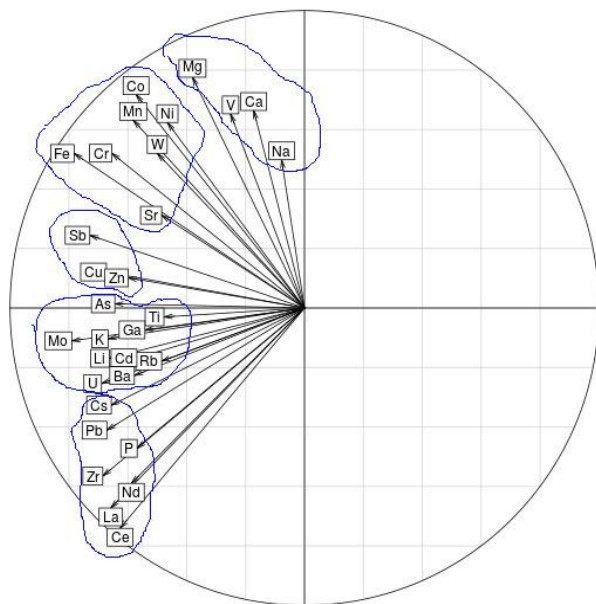**A**

15

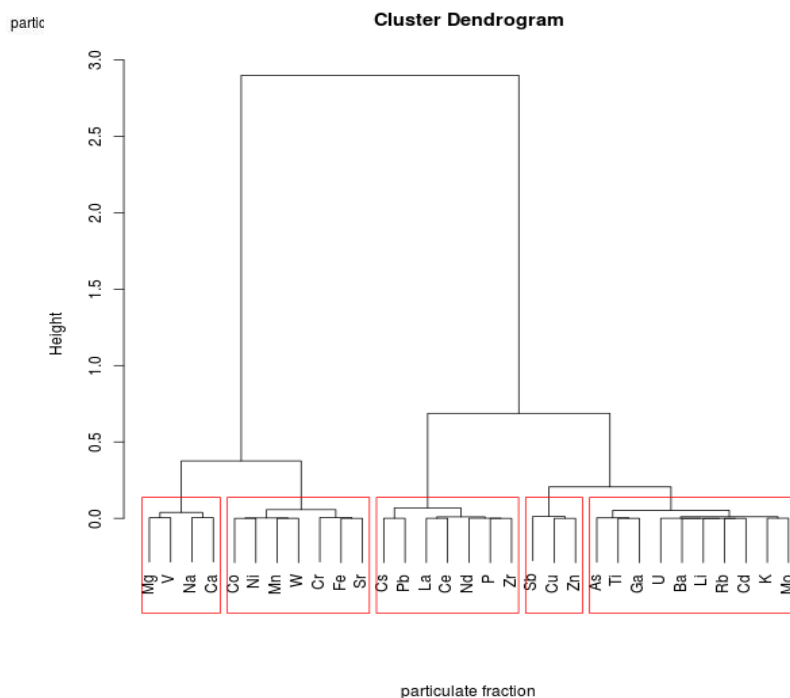**B****B**

25

30

**Fig. S2 A.** PCA Factorial map F1x2 of variables (elements) of a reconstructed table for the particulate fraction. Partition of elements into 5 groups revealed by HCA is reported by a contour line. **B:** Dendrogram of a hierarchical cluster analysis (HCA) performed on variables of a reconstructed table for the particulate fraction using Pearson correlation distance as distance measure and Ward's method for the linkage rule.

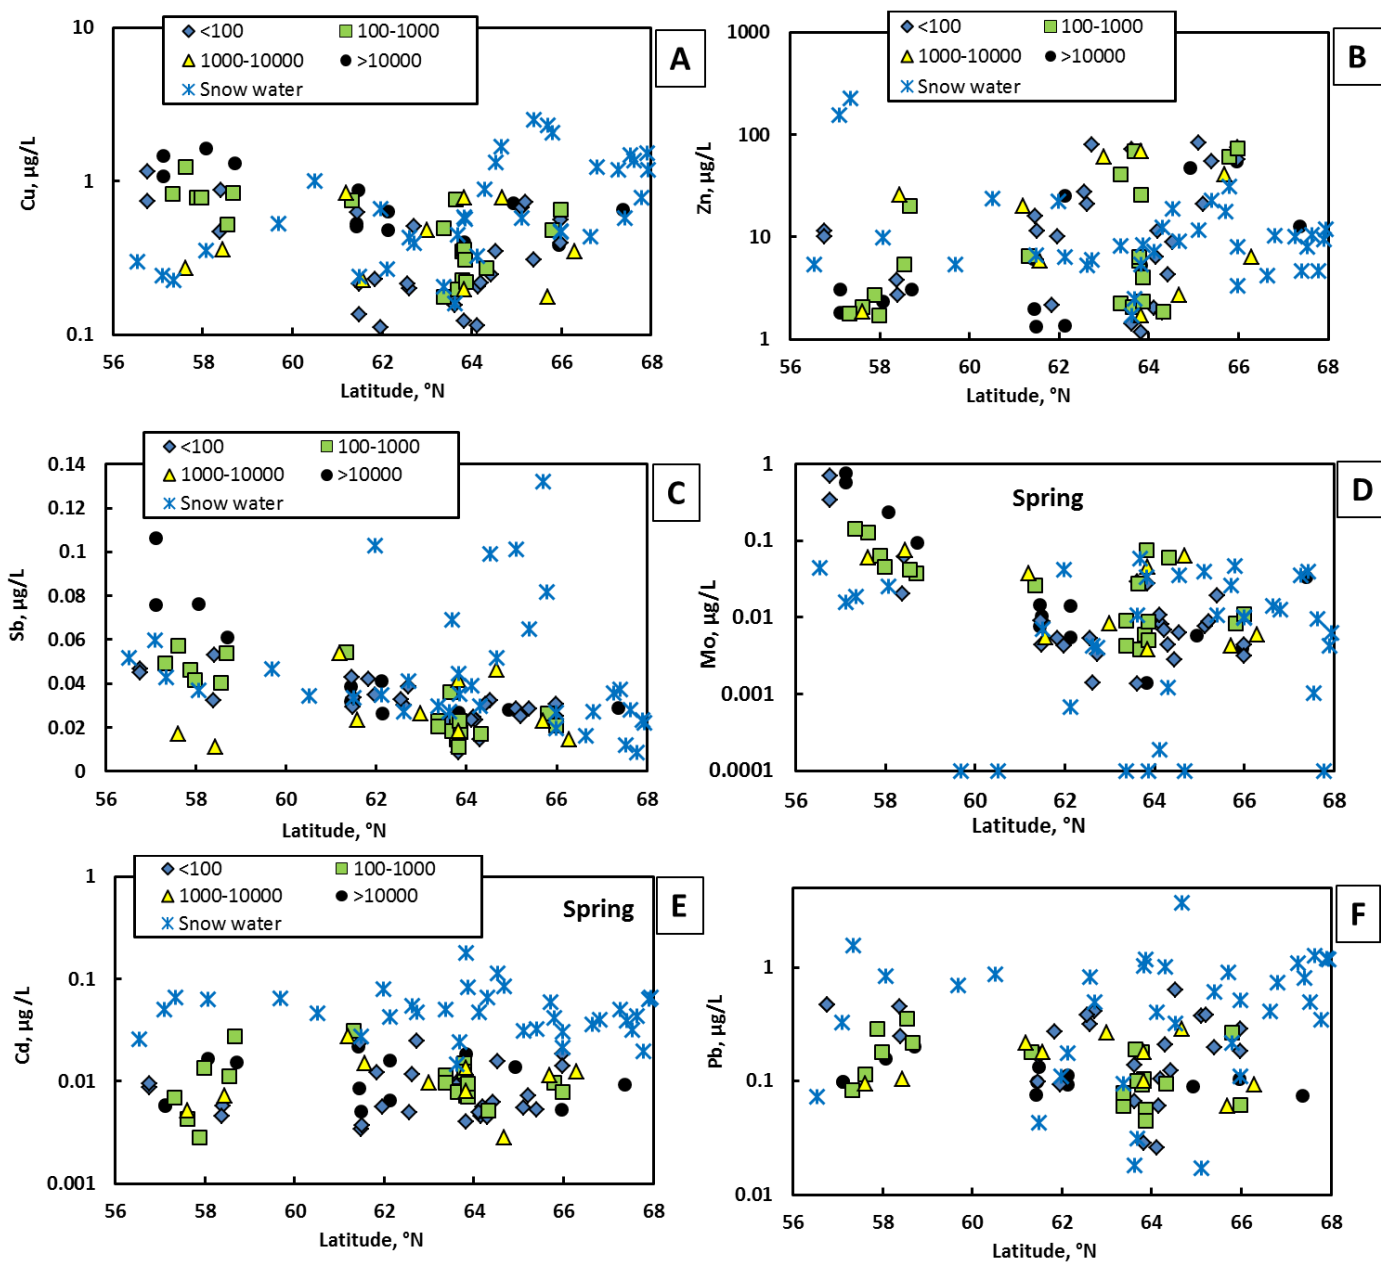

**Fig. S3.** Snow water soluble ( $< 0.45 \mu\text{m}$ ) of Zn (A), Cu (B), Cd (C), Pb (D), Sb (E) and Mo (F) (blue asterisk) compared with actual concentrations in rivers during spring flood (May-June) of different size of the watershed (closed diamonds, squares, triangles and circles correspond to  $< 100$ ,  $100\text{-}1000$ ,  $1000\text{-}10,000$  and  $> 10,000$  km<sup>2</sup> surface area, respectively) in western Siberia along the latitudinal gradient.

**Table S1.** Mineralogical composition of selected snow particles.

| No    | Quartz | Albite | K-Fs | Calcite | Dolomite | Chlorite | Illite | Phlogopite | Amphibole | Pyroxene | Chrysotile | Magnesite | Forsterite | Talc | Magnetite |
|-------|--------|--------|------|---------|----------|----------|--------|------------|-----------|----------|------------|-----------|------------|------|-----------|
| SF-1  | 37     | 20     | 11   | 19      | < 1      | 4        | 7      |            | 2         |          |            |           |            |      |           |
| SF-3  | 38     | 27     | 9    | 3       |          | 10       | 9      |            | 3         |          |            |           |            |      |           |
| SF-14 | 20     | 8      | 6    | 1       | 48       | 5        | 4      |            | 3         | 1        | 2          |           |            | 1    |           |
| SF-31 | 30     | 20     | 12   |         | 8        | 8        |        | 12         | 6         |          | 3          |           |            |      |           |
| SF-33 | 35     | 16     | 9    |         | 10       | 3        |        | 16         | 4         |          | 3          | 4         |            |      |           |
| SF-36 | 47     | 7      | 11   |         | 1        | 4        |        | 5          | 3         | 3        | 12         |           | 4          | 3    |           |
| SF-38 | 48     | 3      | 6    |         | 1        | 6        |        | 4          | 3         |          | 16         |           | 6          | 4    | 3         |
| SF-39 | 41     | 8      | 6    | 4       | 8        | 5        |        | 12         | 2         | 2        | 8          |           | 2          | 2    |           |
| SF-40 | 35     | 12     | 9    | 6       | 3        | 4        |        | 8          | 4         | 3        | 10         |           | 4          | 2    |           |
